# Supplementary material for: Symmetry related [DyIII6MnIII12] cores with different magnetic anisotropies
Source: Royal Society of Chemistry journal article supplement (doi:10.1039/c1sc00166c), 2011-01-01
Supplement: c1sc00166c.pdf [file c1sc00166c.pdf]

## Supporting Information

### Symmetry Related $[\text{Dy}^{\text{III}}_6\text{Mn}^{\text{III}}_{12}]$ Cores with Different Magnetic Anisotropies

Jun-Liang Liu,<sup>a</sup> Fu-Sheng Guo,<sup>a</sup> Zhao-Sha Meng,<sup>a</sup> Yan-Zhen Zheng,<sup>d</sup> Ji-Dong Leng,<sup>a</sup> Ming-Liang Tong,<sup>\*a</sup> Liviu Ungur,<sup>b</sup> Liviu F. Chibotaru,<sup>\*b</sup> Katie J. Heroux<sup>c</sup> and David N. Hendrickson<sup>\*c</sup>

<sup>a</sup> Key Laboratory of Bioinorganic and Synthetic Chemistry of Ministry of Education, State Key Laboratory of Optoelectronic Materials and Technologies, School of Chemistry & Chemical Engineering, Sun Yat-Sen University, Guangzhou, 510275, P. R. China. Fax: (+)86 20 8411-2245; E-mail: tongml@mail.sysu.edu.cn

<sup>b</sup> Division of Quantum and Physical Chemistry and INPAC – Institute of Nanoscale Physics and Chemistry, Celestijnenlaan 200F, Katholieke Universiteit Leuven, B-3001, Belgium. E-mail: Liviu.Chibotaru@chem.kuleuven.be

<sup>c</sup> Division of Quantum and Physical Chemistry and INPAC – Institute of Department of Chemistry and Biochemistry-0358, University of California at San Diego, La Jolla, California, 92093-0358, U.S.A. E-mail: [dhendrickson@ucsd.edu](mailto:dhendrickson@ucsd.edu)

<sup>d</sup> Applied Chemistry Research Center, Frontier Institute of Science and Technology, Xi'an JiaoTong University, Xi'an 710049, China

## Experimental Section

Synthesis of **1**: A mixture of 2-hydroxy-5-methylisophthalaldehyde (33 mg, 0.2 mmol) and 2-aminoethanol (15 mg, 0.25 mmol) in MeCN / MeOH (8 / 8 mL) were stirred and heated at 80 °C for an hour and the solution turned dark yellow. It was then DyCl<sub>3</sub>·6H<sub>2</sub>O (38 mg, 0.1 mmol), Mn(OAc)<sub>2</sub>·4H<sub>2</sub>O (49 mg, 0.2 mmol) and triethylamine (30 mg, 0.3 mmol) were added in order. The resulting brown solution was stirred under ambient conditions for more than 2 hours and then filtered. Small black crystals of **1** (~6% yield) were obtained until the solution nearly dried. Elemental analysis Calcd (%) for **1** (4873.09): C, 29.58; H, 4.05; N, 2.30. Found: C, 28.87; H, 4.12; N, 2.43. Infra-red (KBr disc, cm<sup>-1</sup>): 3423s, 2930m, 2868m, 1677s, 1636vs, 1547vs, 1448vs, 1319m, 1232m, 1165w, 1050m, 974w, 864w, 836w, 766w, 620s, 541s.

Synthesis of **2**: 2-hydroxy-5-methylisophthalaldehyde (33 mg, 0.2 mmol) and 2-aminoethanol (12 mg, 0.2 mmol) in MeCN / MeOH (8 / 8 mL) were mixed at room temperature. It was then LnCl<sub>3</sub>·6H<sub>2</sub>O (0.1 mmol), Mn(OAc)<sub>2</sub>·4H<sub>2</sub>O (49 mg, 0.2 mmol) and triethylamine (30 mg, 0.3 mmol) was immediately added in order. The resulting brown solution was stirred under ambient conditions for more than 2 hours and then filtered. Black prism crystals of **2** (~6% yield) were obtained until the solution nearly dried. Elemental analysis Calcd (%) for **2-Dy** (5105.33): C, 30.58; H, 4.19; N, 2.19. Found: C, 30.95; H, 4.18; N, 2.42. Infra-red (KBr disc, cm<sup>-1</sup>): 3422s, 2926m, 2868m, 1676s, 1636vs, 1548vs, 1448vs, 1320m, 1290m, 1231s, 1166w, 1041m, 972m, 635s, 561s. Elemental analysis Calcd (%) for **2-Y** (4529.68): C, 35.00; H, 4.41; N, 2.47. Found: C, 34.94; H, 4.43; N, 2.53. Infra-red (KBr disc, cm<sup>-1</sup>): 3426s, 2925m, 2867m, 1677s, 1636vs, 1549vs, 1448vs, 1322m, 1291m, 1232m, 1167w, 1047m, 972w, 639s, 561s.

Crystal data of **1** at 150(2) K: C<sub>120</sub>H<sub>196</sub>Dy<sub>6</sub>Mn<sub>12</sub>N<sub>8</sub>O<sub>93</sub>,  $M_r = 4873.09 \text{ g mol}^{-1}$ , orthorhombic, space group *Fddd*,  $a = 22.6849(12) \text{ \AA}$ ,  $b = 37.2467(18) \text{ \AA}$ ,  $c = 45.910(3) \text{ \AA}$ ,  $V = 38792(4) \text{ \AA}^3$ ,  $Z = 8$ ,  $\rho = 1.535 \text{ g cm}^{-3}$ ,  $T = 150 \text{ K}$ ,  $\mu = 3.105 \text{ mm}^{-1}$ ,  $F(000) = 17720$ ,  $2\theta_{\text{max}} = 26.00^\circ$ .  $S = 0.912$ .

Crystal data of **2-Dy** at 150(2) K: C<sub>130</sub>H<sub>212</sub>Dy<sub>6</sub>Mn<sub>12</sub>N<sub>8</sub>O<sub>99</sub>,  $M_r = 5105.33 \text{ g mol}^{-1}$ , triclinic, space group *P*-1,  $a = 19.7904(5) \text{ \AA}$ ,  $b = 21.4477(4) \text{ \AA}$ ,  $c = 26.7375(6) \text{ \AA}$ ,  $\alpha = 95.344(1)^\circ$ ,  $\beta = 97.864(1)^\circ$ ,  $\gamma = 115.293(1)^\circ$ ,  $V = 10017.8(4) \text{ \AA}^3$ ,  $Z = 2$ ,  $\rho = 1.660 \text{ g cm}^{-3}$ ,  $T = 150 \text{ K}$ ,  $\mu = 3.024 \text{ mm}^{-1}$ ,  $F(000) = 4962$ ,  $2\theta_{\text{max}} = 27.00^\circ$ .  $S = 1.099$ .

Crystal data of **2-Y** at 150(2) K: C<sub>132</sub>H<sub>198</sub>Y<sub>6</sub>Mn<sub>12</sub>N<sub>8</sub>O<sub>90</sub>,  $M_r = 4529.68 \text{ g mol}^{-1}$ , triclinic, space group *P*-1,  $a = 19.8997(9) \text{ \AA}$ ,  $b = 21.3603(11) \text{ \AA}$ ,  $c = 26.7219(12) \text{ \AA}$ ,  $\alpha = 95.0010(10)^\circ$ ,  $\beta = 97.6260(10)^\circ$ ,  $\gamma = 115.0900(10)^\circ$ ,  $V = 10064.7(8) \text{ \AA}^3$ ,  $Z = 2$ ,  $\rho = 1.495 \text{ g cm}^{-3}$ ,  $T = 150 \text{ K}$ ,  $\mu = 2.519 \text{ mm}^{-1}$ ,  $F(000) = 4600$ ,  $2\theta_{\text{max}} = 27.00^\circ$ .  $S = 0.854$ .

The disordered water and methanol molecules could not be modelled properly; thus, the program SQUEEZE, a part of the PLATON package of crystallographic software, was used to calculate the solvent disorder area and remove its contribution to the overall intensity data. A total of 490 parameters for **1**, 2084 parameters for **2-Dy** and 2056 parameters for **2-Y** were refined in the final least-squares cycle using 4007 reflections for **1**, 30764 reflections for **2-Dy** and 13897 reflections for **2-Y** with  $I > 2\sigma(I)$  to yield  $R_1$  and  $wR_2$  of 0.0709 and 0.1748 for **1**,  $R_1$  and  $wR_2$  of 0.0530 and 0.1484 for **2-Dy** and  $R_1$  and  $wR_2$  of 0.0864 and 0.2213 for **2-Y**, respectively.

The intensity data were recorded on a Rigaku R-AXIS SPIDER IP diffractometer (MoK $\alpha$ ,  $\lambda = 0.71073 \text{ \AA}$ ) at 150(2) K. The structure was solved by direct methods, and all non-hydrogen atoms were refined anisotropically by least square on  $F^2$  using the SHELXTL program. Hydrogen atoms on organic ligands were generated by the riding mode (G. M. Sheldrick, SHELXTL97, program for crystal structure refinement, University of Göttingen, Germany, 1997). CCDC-779464-65 contain the supplementary crystallographic data for this paper. These data can be obtained free of charge via [www.ccdc.cam.ac.uk/conts/retrieving.html](http://www.ccdc.cam.ac.uk/conts/retrieving.html) (or from the Cambridge Crystallographic Data Centre, 12 Union Road, Cambridge CB21EZ, UK; fax: (+44)1223-336-033; or deposit@ccdc.cam.ac.uk).

Magnetic measurements were performed using a Quantum Design MPMS XL-7 SQUID magnetometer. The susceptibility measurement was performed in the 300-2 K temperature range with an applied field of 500 Oe. For magnetization measurements, the samples were sealed in parafilm to avoid any orientation of the crystallites. Ac magnetic susceptibilities were obtained with 5 Oe ac fields at zero dc fields.

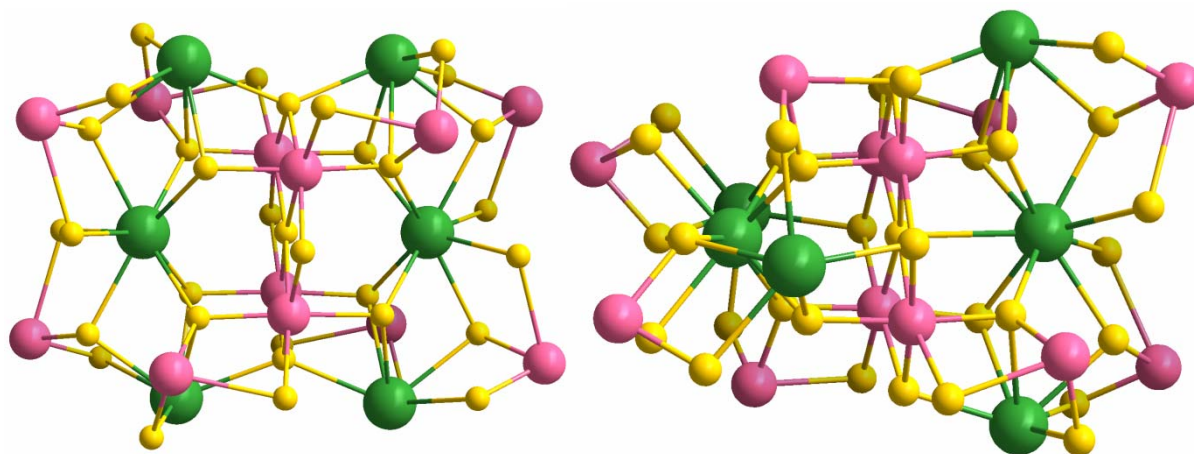

**Figure S1.** The cores of **1** (left) and **2** (right). Atom color code: Ln<sup>III</sup> = green; Mn<sup>III</sup> = magenta; O = yellow; N = blue.

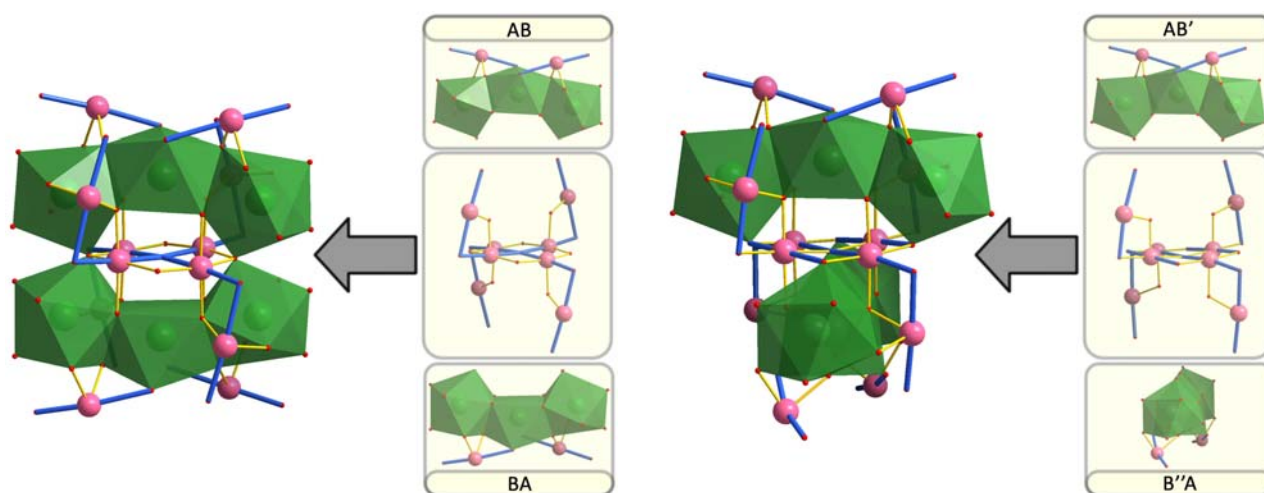

**Figure S2.** Composition of the [Ln<sup>III</sup><sub>6</sub>Mn<sup>III</sup><sub>12</sub>] cores for **1** (left) and **2** (right). Each Ln<sup>III</sup> is highlighted as a green polyhedron and the Jahn-Teller axes of Mn<sup>III</sup> ions are highlighted as blue sticks. Hydrogen atoms and lattice solvent molecules have been omitted for clarity.

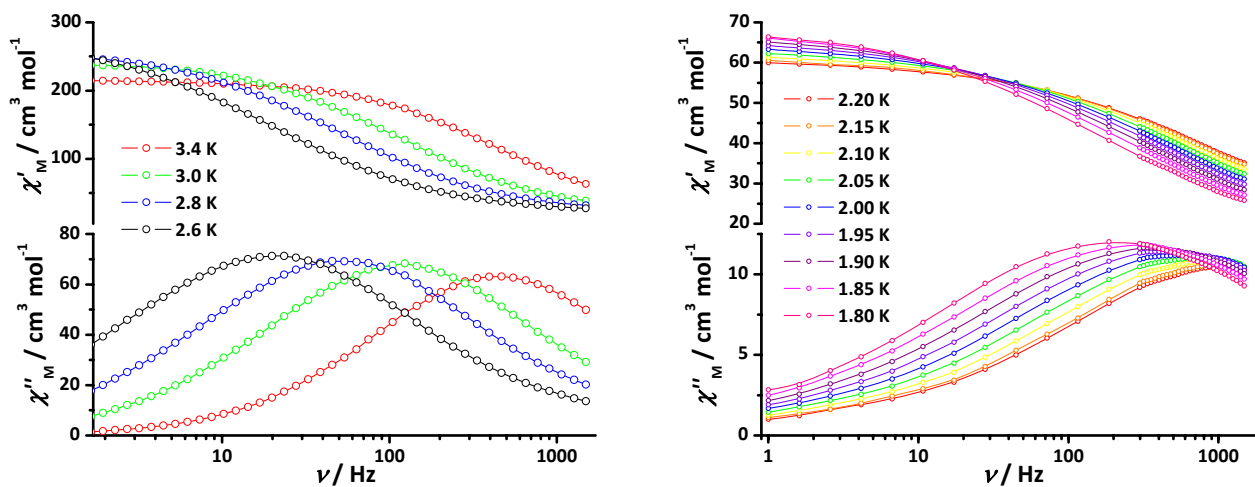

**Figure S3.** Variable-frequency ac susceptibility data for **1-Dy** (left) and **2-Dy** (right), collected at different temperatures under a zero dc field in a 5 G ac field.

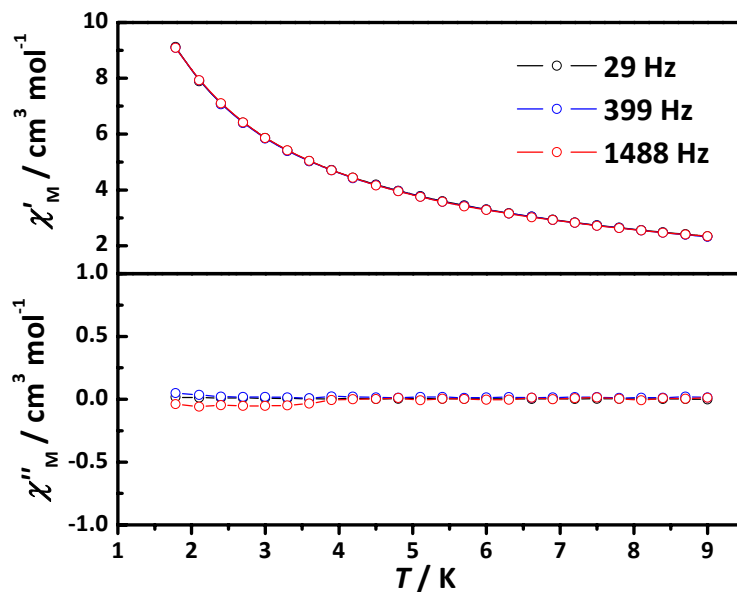

Figure S4. Plot of ac susceptibility vs. temperature for **2-Y** oscillating at 29-1488 Hz at  $H_{ac} = 5$  G and  $H_{dc} = 0$ .

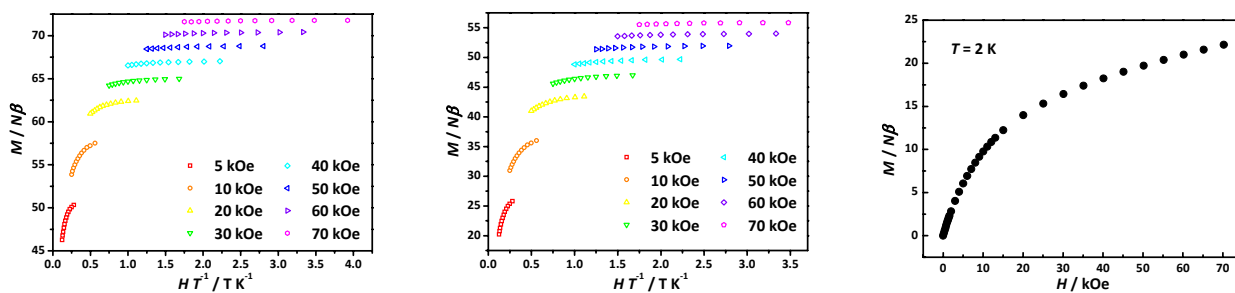

Figure S5. The plots of  $M/N\beta$  vs.  $H/T$  for **1-Dy** (left) and **2-Dy** (middle), and  $M/N\beta$  vs.  $H$  for **2-Y** (right) at 2 K.

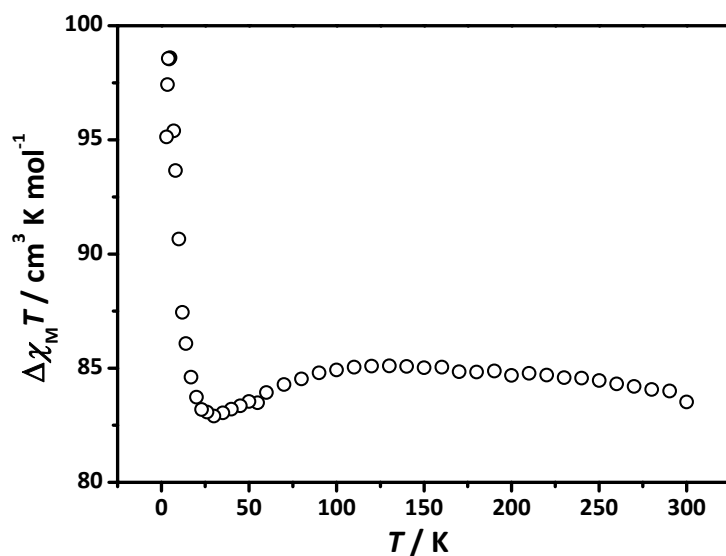

Figure S6.  $\chi_m T$  vs  $T$  plots of subtracting **2-Y** from the plot **2-Dy**.

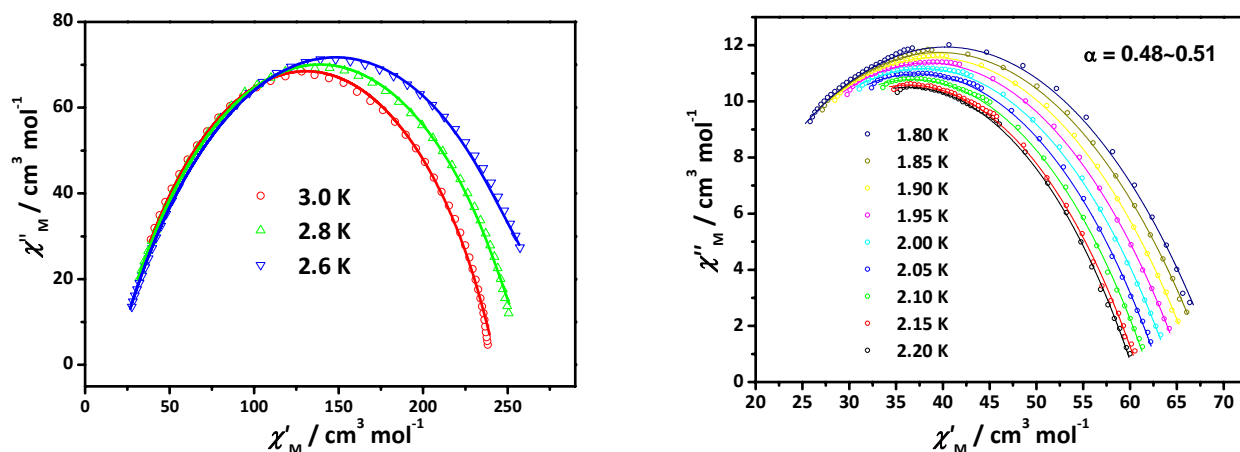

**Figure S7.** Cole-Cole plots for **1-Dy** (left) and **2-Dy** (right), obtained from variable-frequency ac susceptibility data under a zero dc field in the temperature range. Solid lines represent fits to the data using a generalized Debye model. The  $\alpha$  parameters were abstracted, giving 0.30-0.36 for **1-Dy**, 0.48-0.51 for **2-Dy**, respectively.

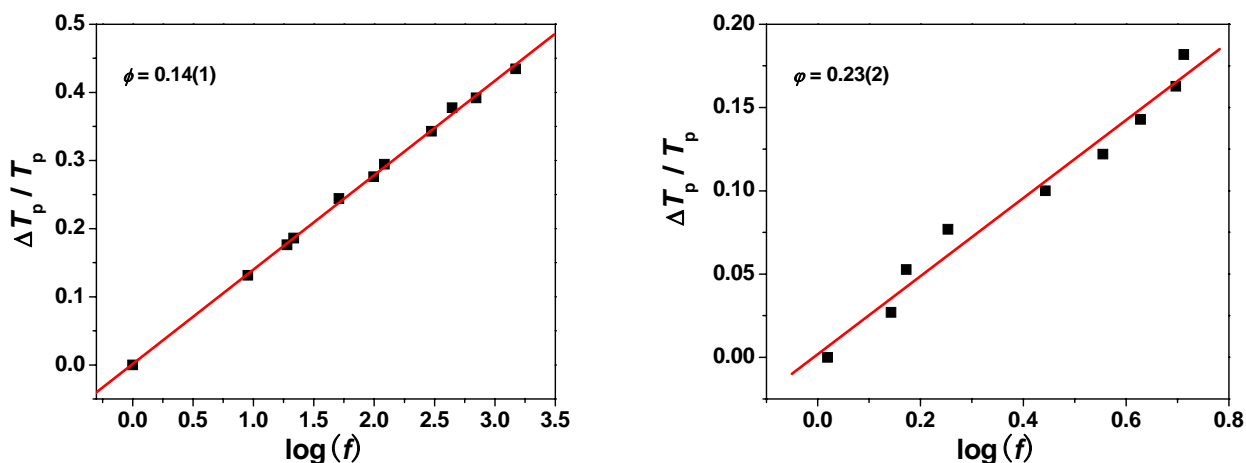

**Figure S8.** The  $\log(f)$  vs.  $\Delta T_p/T_p$  plots for **1-Dy** (left) and **2-Dy** (right). The value of  $\phi$  can be extracted from the slope.

**Table S1.** Bond valence sum calculations of Mn and Ln oxidation states in the crystal structures of **1-Dy**, **2-Dy** and **2-Y**.

| Complex <b>1-Dy</b> |           |     |           |
|---------------------|-----------|-----|-----------|
| Dy1                 | 2.976(24) | Dy2 | 2.644(19) |
|                     | +2        |     | +3        |
| Mn1                 | 3.547(29) | Mn2 | 3.209(27) |
| Mn2                 | 3.439(38) | Mn3 | 2.941(34) |
| Mn3                 | 3.556(40) |     | 3.080(36) |
| Complex <b>2-Dy</b> |           |     |           |
| Dy1                 | 2.940(12) | Dy2 | 2.696(10) |
| Dy3                 | 2.929(13) | Dy4 | 2.895(13) |
| Dy5                 | 2.741(11) | Dy6 | 2.862(13) |
|                     | +2        |     | +3        |
| Mn1                 | 3.338(17) | Mn2 | 3.020(15) |
| Mn2                 | 3.416(18) | Mn3 | 3.091(16) |
| Mn3                 | 3.357(18) |     | 3.037(16) |

|                    |           |           |           |
|--------------------|-----------|-----------|-----------|
| Mn4                | 3.350(17) | 3.089(16) | 3.031(15) |
| Mn5                | 3.423(19) | 3.088(17) | 2.909(17) |
| Mn6                | 3.450(21) | 3.213(20) | 2.930(19) |
| Mn7                | 3.511(21) | 3.270(20) | 3.069(19) |
| Mn8                | 3.486(26) | 3.247(24) | 3.034(23) |
| Mn9                | 3.455(21) | 3.219(20) | 3.144(19) |
| Mn10               | 3.455(21) | 3.209(20) | 3.134(19) |
| Mn11               | 3.454(22) | 3.218(20) | 3.016(20) |
| Mn12               | 3.446(19) | 3.210(18) | 2.978(17) |
| Complex <b>2-Y</b> |           |           |           |
| Y1                 | 2.940(12) | Y2        | 2.696(10) |
| Y3                 | 2.929(13) | Y4        | 2.895(13) |
| Y5                 | 2.741(11) | Y6        | 2.862(13) |
|                    | +2        | +3        | +4        |
| Mn1                |           |           |           |
| Mn2                | 3.338(17) | 3.078(16) | 3.020(15) |
| Mn3                |           |           |           |
|                    | 3.416(18) | 3.150(16) | 3.091(16) |
|                    | 3.357(18) | 3.095(16) | 3.037(16) |
| Mn4                | 3.350(17) | 3.089(16) | 3.031(15) |
| Mn5                | 3.423(19) | 3.088(17) | 2.909(17) |
| Mn6                | 3.450(21) | 3.213(20) | 2.930(19) |
| Mn7                | 3.511(21) | 3.270(20) | 3.069(19) |
| Mn8                | 3.486(26) | 3.247(24) | 3.034(23) |
| Mn9                | 3.455(21) | 3.219(20) | 3.144(19) |
| Mn10               | 3.455(21) | 3.209(20) | 3.134(19) |
| Mn11               | 3.454(22) | 3.218(20) | 3.016(20) |
| Mn12               | 3.446(19) | 3.210(18) | 2.978(17) |

**Table S2.** Bond lengths [Å] and angles [°] for **1-Dy**, **2-Dy** and **2-Y**.

| <b>1-Dy</b>         |           |                   |           |
|---------------------|-----------|-------------------|-----------|
| Dy(1)-O(19)         | 2.306(10) | Mn(1)-O(6)        | 1.968(8)  |
| Dy(1)-O(14)#1       | 2.336(11) | Mn(1)-O(3)        | 2.100(2)  |
| Dy(1)-O(8)          | 2.341(10) | Mn(1)-O(13)       | 2.152(10) |
| Dy(1)-O(17)         | 2.347(8)  | Mn(2)-O(7)        | 1.888(9)  |
| Dy(1)-O(5)          | 2.357(8)  | Mn(2)-O(8)        | 1.916(9)  |
| Dy(1)-O(4)          | 2.434(8)  | Mn(2)-O(1)        | 1.918(8)  |
| Dy(1)-O(2)          | 2.436(4)  | Mn(2)-N(1)        | 1.969(12) |
| Dy(1)-O(11)         | 2.608(9)  | Mn(2)-O(15)       | 2.227(8)  |
| Dy(1)-O(1)          | 2.686(7)  | Mn(2)-O(13)       | 2.367(8)  |
| Dy(2)-O(1)          | 2.328(8)  | Mn(3)-O(10)       | 1.868(9)  |
| Dy(2)-O(5)          | 2.394(8)  | Mn(3)-O(11)       | 1.878(9)  |
| Dy(2)-O(4)          | 2.456(7)  | Mn(3)-O(4)        | 1.916(8)  |
| Dy(2)-O(16)         | 2.480(9)  | Mn(3)-N(2)        | 1.967(12) |
| Mn(1)-O(1)          | 1.886(8)  | Mn(3)-O(18)       | 2.178(10) |
| Mn(1)-O(2)          | 1.913(8)  | Mn(3)-O(16)#2     | 2.444(8)  |
| Mn(1)-O(5)#1        | 1.959(8)  | O(5)#1-Mn(1)-O(6) | 88.8(3)   |
| O(19)-Dy(1)-O(14)#1 | 77.0(4)   | O(1)-Mn(1)-O(3)   | 91.9(3)   |
| O(19)-Dy(1)-O(8)    | 74.5(4)   | O(2)-Mn(1)-O(3)   | 85.4(3)   |

|                     |          |                     |          |
|---------------------|----------|---------------------|----------|
| O(14)#1-Dy(1)-O(8)  | 150.2(3) | O(5)#1-Mn(1)-O(3)   | 87.1(2)  |
| O(19)-Dy(1)-O(17)   | 74.5(3)  | O(6)-Mn(1)-O(3)     | 84.4(3)  |
| O(14)#1-Dy(1)-O(17) | 86.0(3)  | O(1)-Mn(1)-O(13)    | 84.3(3)  |
| O(8)-Dy(1)-O(17)    | 78.0(3)  | O(2)-Mn(1)-O(13)    | 96.9(4)  |
| O(19)-Dy(1)-O(5)    | 140.2(3) | O(5)#1-Mn(1)-O(13)  | 96.9(3)  |
| O(14)#1-Dy(1)-O(5)  | 79.9(3)  | O(6)-Mn(1)-O(13)    | 93.6(4)  |
| O(8)-Dy(1)-O(5)     | 128.7(3) | O(3)-Mn(1)-O(13)    | 175.5(2) |
| O(17)-Dy(1)-O(5)    | 135.6(3) | O(7)-Mn(2)-O(8)     | 172.7(4) |
| O(19)-Dy(1)-O(4)    | 147.5(3) | O(7)-Mn(2)-O(1)     | 98.8(4)  |
| O(14)#1-Dy(1)-O(4)  | 129.2(3) | O(8)-Mn(2)-O(1)     | 88.5(4)  |
| O(8)-Dy(1)-O(4)     | 75.5(3)  | O(7)-Mn(2)-N(1)     | 89.7(5)  |
| O(17)-Dy(1)-O(4)    | 87.4(3)  | O(8)-Mn(2)-N(1)     | 83.0(4)  |
| O(5)-Dy(1)-O(4)     | 70.5(3)  | O(1)-Mn(2)-N(1)     | 169.5(4) |
| O(19)-Dy(1)-O(2)    | 78.1(3)  | O(7)-Mn(2)-O(15)    | 90.6(3)  |
| O(14)#1-Dy(1)-O(2)  | 81.0(2)  | O(8)-Mn(2)-O(15)    | 89.6(3)  |
| O(8)-Dy(1)-O(2)     | 101.6(2) | O(1)-Mn(2)-O(15)    | 95.7(3)  |
| O(17)-Dy(1)-O(2)    | 151.7(3) | N(1)-Mn(2)-O(15)    | 90.4(4)  |
| O(5)-Dy(1)-O(2)     | 66.5(3)  | O(7)-Mn(2)-O(13)    | 90.7(3)  |
| O(4)-Dy(1)-O(2)     | 120.2(3) | O(8)-Mn(2)-O(13)    | 89.9(3)  |
| O(19)-Dy(1)-O(11)   | 132.5(3) | O(1)-Mn(2)-O(13)    | 77.9(3)  |
| O(14)#1-Dy(1)-O(11) | 68.6(3)  | N(1)-Mn(2)-O(13)    | 95.9(4)  |
| O(8)-Dy(1)-O(11)    | 127.4(3) | O(15)-Mn(2)-O(13)   | 173.6(4) |
| O(17)-Dy(1)-O(11)   | 71.6(3)  | O(10)-Mn(3)-O(11)   | 174.8(5) |
| O(5)-Dy(1)-O(11)    | 64.1(3)  | O(10)-Mn(3)-O(4)    | 97.9(4)  |
| O(4)-Dy(1)-O(11)    | 61.6(3)  | O(11)-Mn(3)-O(4)    | 86.0(4)  |
| O(2)-Dy(1)-O(11)    | 125.2(2) | O(10)-Mn(3)-N(2)    | 90.7(5)  |
| O(19)-Dy(1)-O(1)    | 112.7(3) | O(11)-Mn(3)-N(2)    | 85.3(5)  |
| O(14)#1-Dy(1)-O(1)  | 137.8(3) | O(4)-Mn(3)-N(2)     | 170.8(4) |
| O(8)-Dy(1)-O(1)     | 63.9(3)  | O(10)-Mn(3)-O(18)   | 90.7(4)  |
| O(17)-Dy(1)-O(1)    | 136.0(3) | O(11)-Mn(3)-O(18)   | 92.4(4)  |
| O(5)-Dy(1)-O(1)     | 66.9(3)  | O(4)-Mn(3)-O(18)    | 95.0(4)  |
| O(4)-Dy(1)-O(1)     | 63.3(2)  | N(2)-Mn(3)-O(18)    | 88.2(4)  |
| O(2)-Dy(1)-O(1)     | 62.7(2)  | O(10)-Mn(3)-O(16)#2 | 88.1(3)  |
| O(11)-Dy(1)-O(1)    | 114.8(3) | O(11)-Mn(3)-O(16)#2 | 89.5(3)  |
| O(1)#2-Dy(2)-O(1)   | 126.5(4) | O(4)-Mn(3)-O(16)#2  | 75.8(3)  |
| O(1)#2-Dy(2)-O(5)   | 82.1(3)  | N(2)-Mn(3)-O(16)#2  | 101.2(4) |
| O(1)-Dy(2)-O(5)     | 72.5(3)  | O(18)-Mn(3)-O(16)#2 | 170.5(4) |
| O(1)#2-Dy(2)-O(5)#2 | 72.5(3)  | Mn(1)-O(1)-Mn(2)    | 108.9(4) |
| O(1)-Dy(2)-O(5)#2   | 82.1(3)  | Mn(1)-O(1)-Dy(2)    | 117.2(4) |
| O(5)-Dy(2)-O(5)#2   | 121.7(4) | Mn(2)-O(1)-Dy(2)    | 129.3(4) |

|                      |          |                      |            |
|----------------------|----------|----------------------|------------|
| O(1)#2-Dy(2)-O(4)    | 142.3(3) | Mn(1)-O(1)-Dy(1)     | 99.1(3)    |
| O(1)-Dy(2)-O(4)      | 68.5(3)  | Mn(2)-O(1)-Dy(1)     | 97.5(3)    |
| O(5)-Dy(2)-O(4)      | 69.6(3)  | Dy(2)-O(1)-Dy(1)     | 95.0(3)    |
| O(5)#2-Dy(2)-O(4)    | 143.9(3) | Mn(1)#1-O(2)-Mn(1)   | 100.3(5)   |
| O(1)#2-Dy(2)-O(4)#2  | 68.5(3)  | Mn(1)#1-O(2)-Dy(1)#1 | 107.28(10) |
| O(1)-Dy(2)-O(4)#2    | 142.3(3) | Mn(1)-O(2)-Dy(1)#1   | 99.45(9)   |
| O(5)-Dy(2)-O(4)#2    | 143.9(3) | Mn(1)#1-O(2)-Dy(1)   | 99.45(9)   |
| O(5)#2-Dy(2)-O(4)#2  | 69.6(3)  | Mn(1)-O(2)-Dy(1)     | 107.28(10) |
| O(4)-Dy(2)-O(4)#2    | 123.8(4) | Dy(1)#1-O(2)-Dy(1)   | 137.8(5)   |
| O(1)#2-Dy(2)-O(16)   | 132.9(3) | Mn(1)#1-O(3)-Mn(1)#2 | 91.45(11)  |
| O(1)-Dy(2)-O(16)     | 84.5(3)  | Mn(1)#1-O(3)-Mn(1)   | 88.79(11)  |
| O(5)-Dy(2)-O(16)     | 145.0(3) | Mn(1)#2-O(3)-Mn(1)   | 174.73(9)  |
| O(5)#2-Dy(2)-O(16)   | 79.2(3)  | Mn(1)#1-O(3)-Mn(1)#3 | 174.73(9)  |
| O(4)-Dy(2)-O(16)     | 77.7(3)  | Mn(1)#2-O(3)-Mn(1)#3 | 88.79(11)  |
| O(4)#2-Dy(2)-O(16)   | 66.6(3)  | Mn(1)-O(3)-Mn(1)#3   | 91.45(11)  |
| O(1)#2-Dy(2)-O(16)#2 | 84.5(3)  | Mn(3)-O(4)-Dy(1)     | 104.9(3)   |
| O(1)-Dy(2)-O(16)#2   | 132.9(3) | Mn(3)-O(4)-Dy(2)     | 117.8(4)   |
| O(5)-Dy(2)-O(16)#2   | 79.2(3)  | Dy(1)-O(4)-Dy(2)     | 98.5(3)    |
| O(5)#2-Dy(2)-O(16)#2 | 145.0(3) | Mn(1)#1-O(5)-Dy(1)   | 100.8(3)   |
| O(4)-Dy(2)-O(16)#2   | 66.6(3)  | Mn(1)#1-O(5)-Dy(2)   | 119.3(3)   |
| O(4)#2-Dy(2)-O(16)#2 | 77.7(3)  | Dy(1)-O(5)-Dy(2)     | 102.5(3)   |
| O(16)-Dy(2)-O(16)#2  | 99.2(4)  | Mn(1)#3-O(6)-Mn(1)   | 99.7(5)    |
| O(1)-Mn(1)-O(2)      | 89.4(2)  | Mn(2)-O(8)-Dy(1)     | 110.1(4)   |
| O(1)-Mn(1)-O(5)#1    | 174.8(4) | Mn(3)-O(11)-Dy(1)    | 99.8(4)    |
| O(2)-Mn(1)-O(5)#1    | 85.5(3)  | Mn(1)-O(13)-Mn(2)    | 86.3(3)    |
| O(1)-Mn(1)-O(6)      | 96.2(2)  | Mn(3)#2-O(16)-Dy(2)  | 99.3(3)    |
| O(2)-Mn(1)-O(6)      | 168.6(4) |                      |            |

Symmetry transformations used to generate equivalent atoms:

#1 -x+9/4,y,-z+1/4 #2 -x+9/4,-y+5/4,z #3 x,-y+5/4,-z+1/4

## 2-Dy

|             |          |             |          |
|-------------|----------|-------------|----------|
| Dy(1)-O(44) | 2.288(4) | Mn(1)-O(12) | 1.881(4) |
| Dy(1)-O(69) | 2.325(4) | Mn(1)-O(18) | 1.932(4) |
| Dy(1)-O(21) | 2.345(4) | Mn(1)-O(5)  | 1.963(4) |
| Dy(1)-O(4)  | 2.388(4) | Mn(1)-O(1)  | 1.976(4) |
| Dy(1)-O(45) | 2.425(5) | Mn(1)-O(9)  | 2.183(4) |
| Dy(1)-O(10) | 2.452(4) | Mn(1)-O(4)  | 2.257(4) |
| Dy(1)-O(5)  | 2.479(4) | Mn(2)-O(2)  | 1.882(4) |
| Dy(1)-O(27) | 2.497(4) | Mn(2)-O(4)  | 1.911(4) |
| Dy(1)-O(2)  | 2.691(4) | Mn(2)-O(6)  | 1.936(4) |



---

|             |          |             |          |
|-------------|----------|-------------|----------|
| Dy(2)-O(7)  | 2.348(4) | Mn(2)-O(13) | 1.949(4) |
| Dy(2)-O(5)  | 2.350(4) | Mn(2)-O(54) | 2.201(4) |
| Dy(2)-O(3)  | 2.394(4) | Mn(2)-O(1)  | 2.291(4) |
| Dy(2)-O(2)  | 2.402(4) | Mn(3)-O(3)  | 1.894(4) |
| Dy(2)-O(10) | 2.440(4) | Mn(3)-O(8)  | 1.917(4) |
| Dy(2)-O(11) | 2.464(4) | Mn(3)-O(9)  | 1.938(5) |
| Dy(2)-O(58) | 2.496(4) | Mn(3)-O(15) | 1.954(4) |
| Dy(2)-O(62) | 2.511(4) | Mn(3)-O(56) | 2.207(5) |
| Dy(2)-O(1)  | 2.780(4) | Mn(3)-O(1)  | 2.277(4) |
| Dy(3)-O(47) | 2.314(5) | Mn(4)-O(14) | 1.875(4) |
| Dy(3)-O(61) | 2.321(5) | Mn(4)-O(19) | 1.921(5) |
| Dy(3)-O(24) | 2.362(5) | Mn(4)-O(7)  | 1.944(4) |
| Dy(3)-O(8)  | 2.364(4) | Mn(4)-O(1)  | 1.996(4) |
| Dy(3)-O(48) | 2.401(5) | Mn(4)-O(6)  | 2.190(4) |
| Dy(3)-O(11) | 2.444(4) | Mn(4)-O(8)  | 2.250(4) |
| Dy(3)-O(7)  | 2.482(4) | Mn(5)-O(21) | 1.894(4) |
| Dy(3)-O(30) | 2.506(5) | Mn(5)-O(2)  | 1.908(4) |
| Dy(3)-O(3)  | 2.697(5) | Mn(5)-O(20) | 1.931(4) |
| Dy(4)-O(67) | 2.279(5) | Mn(5)-N(1)  | 1.984(5) |
| Dy(4)-O(33) | 2.330(4) | Mn(5)-O(63) | 2.229(4) |
| Dy(4)-O(55) | 2.345(5) | Mn(5)-O(54) | 2.336(4) |
| Dy(4)-O(13) | 2.389(4) | Mn(6)-O(24) | 1.887(5) |
| Dy(4)-O(16) | 2.399(4) | Mn(6)-O(3)  | 1.896(4) |
| Dy(4)-O(70) | 2.401(5) | Mn(6)-O(23) | 1.909(5) |
| Dy(4)-O(6)  | 2.434(4) | Mn(6)-N(2)  | 1.984(6) |
| Dy(4)-O(39) | 2.469(5) | Mn(6)-O(59) | 2.221(4) |
| Dy(5)-O(12) | 2.248(4) | Mn(6)-O(56) | 2.330(4) |
| Dy(5)-O(14) | 2.256(4) | Mn(7)-O(27) | 1.872(4) |
| Dy(5)-O(52) | 2.443(5) | Mn(7)-O(26) | 1.891(4) |
| Dy(5)-O(16) | 2.453(4) | Mn(7)-O(10) | 1.904(4) |
| Dy(5)-O(17) | 2.454(5) | Mn(7)-N(3)  | 1.986(6) |
| Dy(5)-O(50) | 2.456(4) | Mn(7)-O(68) | 2.177(5) |
| Dy(5)-O(15) | 2.466(4) | Mn(7)-O(58) | 2.511(4) |
| Dy(5)-O(13) | 2.484(4) | Mn(8)-O(29) | 1.876(5) |
| Dy(6)-O(65) | 2.309(5) | Mn(8)-O(30) | 1.887(5) |
| Dy(6)-O(36) | 2.319(5) | Mn(8)-O(11) | 1.915(5) |
| Dy(6)-O(57) | 2.342(5) | Mn(8)-N(4)  | 1.978(6) |
| Dy(6)-O(15) | 2.377(5) | Mn(8)-O(60) | 2.188(5) |
| Dy(6)-O(71) | 2.399(5) | Mn(8)-O(62) | 2.514(4) |
| Dy(6)-O(17) | 2.408(4) | Mn(9)-O(14) | 1.900(4) |

---

|                   |            |                   |            |
|-------------------|------------|-------------------|------------|
| Dy(6)-O(9)        | 2.445(4)   | Mn(9)-O(33)       | 1.906(5)   |
| Dy(6)-O(42)       | 2.470(5)   | Mn(9)-O(32)       | 1.946(5)   |
| Mn(10)-O(36)      | 1.912(4)   | Mn(9)-N(5)        | 1.975(6)   |
| Mn(10)-O(35)      | 1.944(5)   | Mn(9)-O(19)       | 2.222(4)   |
| Mn(10)-N(6)       | 1.981(6)   | Mn(9)-O(51)       | 2.244(5)   |
| Mn(10)-O(18)      | 2.194(4)   | Mn(10)-O(12)      | 1.892(4)   |
| Mn(10)-O(53)      | 2.270(5)   | Mn(12)-O(42)      | 1.883(5)   |
| Mn(11)-O(39)      | 1.871(4)   | Mn(12)-O(41)      | 1.883(5)   |
| Mn(11)-O(38)      | 1.885(5)   | Mn(12)-O(17)      | 1.937(4)   |
| Mn(11)-O(16)      | 1.941(4)   | Mn(12)-N(8)       | 1.973(6)   |
| Mn(11)-N(7)       | 1.972(6)   | Mn(12)-O(64)      | 2.192(6)   |
| Mn(11)-O(66)      | 2.188(5)   | Mn(12)-O(50)      | 2.442(5)   |
| Mn(11)-O(52)      | 2.509(5)   |                   |            |
| O(44)-Dy(1)-O(69) | 84.77(16)  | O(3)-Dy(2)-O(58)  | 84.40(14)  |
| O(44)-Dy(1)-O(21) | 143.96(14) | O(2)-Dy(2)-O(58)  | 130.26(14) |
| O(69)-Dy(1)-O(21) | 75.34(15)  | O(10)-Dy(2)-O(58) | 65.82(14)  |
| O(44)-Dy(1)-O(4)  | 79.14(14)  | O(11)-Dy(2)-O(58) | 75.04(15)  |
| O(69)-Dy(1)-O(4)  | 146.51(15) | O(7)-Dy(2)-O(62)  | 75.31(14)  |
| O(21)-Dy(1)-O(4)  | 101.35(14) | O(5)-Dy(2)-O(62)  | 145.61(13) |
| O(44)-Dy(1)-O(45) | 72.24(16)  | O(3)-Dy(2)-O(62)  | 129.81(14) |
| O(69)-Dy(1)-O(45) | 73.37(16)  | O(2)-Dy(2)-O(62)  | 83.78(13)  |
| O(21)-Dy(1)-O(45) | 73.38(15)  | O(10)-Dy(2)-O(62) | 74.56(14)  |
| O(4)-Dy(1)-O(45)  | 73.81(15)  | O(11)-Dy(2)-O(62) | 65.68(14)  |
| O(44)-Dy(1)-O(10) | 136.67(15) | O(58)-Dy(2)-O(62) | 98.41(15)  |
| O(69)-Dy(1)-O(10) | 92.02(14)  | O(7)-Dy(2)-O(1)   | 63.75(13)  |
| O(21)-Dy(1)-O(10) | 74.71(14)  | O(5)-Dy(2)-O(1)   | 63.61(13)  |
| O(4)-Dy(1)-O(10)  | 119.69(13) | O(3)-Dy(2)-O(1)   | 65.66(12)  |
| O(45)-Dy(1)-O(10) | 147.34(15) | O(2)-Dy(2)-O(1)   | 65.49(12)  |
| O(44)-Dy(1)-O(5)  | 84.92(14)  | O(10)-Dy(2)-O(1)  | 121.37(12) |
| O(69)-Dy(1)-O(5)  | 139.70(15) | O(11)-Dy(2)-O(1)  | 120.61(13) |
| O(21)-Dy(1)-O(5)  | 129.18(14) | O(58)-Dy(2)-O(1)  | 131.41(14) |
| O(4)-Dy(1)-O(5)   | 67.98(13)  | O(62)-Dy(2)-O(1)  | 130.17(14) |
| O(45)-Dy(1)-O(5)  | 138.45(14) | O(47)-Dy(3)-O(61) | 83.99(18)  |
| O(10)-Dy(1)-O(5)  | 70.04(13)  | O(47)-Dy(3)-O(24) | 143.14(16) |
| O(44)-Dy(1)-O(27) | 74.95(15)  | O(61)-Dy(3)-O(24) | 75.69(19)  |
| O(69)-Dy(1)-O(27) | 73.10(15)  | O(47)-Dy(3)-O(8)  | 79.67(16)  |
| O(21)-Dy(1)-O(27) | 125.09(15) | O(61)-Dy(3)-O(8)  | 147.77(15) |
| O(4)-Dy(1)-O(27)  | 128.98(14) | O(24)-Dy(3)-O(8)  | 101.71(16) |
| O(45)-Dy(1)-O(27) | 134.53(16) | O(47)-Dy(3)-O(48) | 72.52(18)  |
| O(10)-Dy(1)-O(27) | 62.91(14)  | O(61)-Dy(3)-O(48) | 74.66(17)  |

---

|                   |            |                   |            |
|-------------------|------------|-------------------|------------|
| O(5)-Dy(1)-O(27)  | 66.60(14)  | O(24)-Dy(3)-O(48) | 72.59(18)  |
| O(44)-Dy(1)-O(2)  | 138.81(13) | O(8)-Dy(3)-O(48)  | 74.00(15)  |
| O(69)-Dy(1)-O(2)  | 135.85(14) | O(47)-Dy(3)-O(11) | 137.06(16) |
| O(21)-Dy(1)-O(2)  | 63.82(13)  | O(61)-Dy(3)-O(11) | 91.18(16)  |
| O(4)-Dy(1)-O(2)   | 62.53(13)  | O(24)-Dy(3)-O(11) | 74.60(16)  |
| O(45)-Dy(1)-O(2)  | 108.13(14) | O(8)-Dy(3)-O(11)  | 119.51(14) |
| O(10)-Dy(1)-O(2)  | 62.51(12)  | O(48)-Dy(3)-O(11) | 146.55(17) |
| O(5)-Dy(1)-O(2)   | 67.80(13)  | O(47)-Dy(3)-O(7)  | 87.09(15)  |
| O(27)-Dy(1)-O(2)  | 117.30(13) | O(61)-Dy(3)-O(7)  | 139.17(16) |
| O(7)-Dy(2)-O(5)   | 127.35(14) | O(24)-Dy(3)-O(7)  | 127.97(15) |
| O(7)-Dy(2)-O(3)   | 74.80(15)  | O(8)-Dy(3)-O(7)   | 67.64(14)  |
| O(5)-Dy(2)-O(3)   | 84.05(14)  | O(48)-Dy(3)-O(7)  | 139.17(15) |
| O(7)-Dy(2)-O(2)   | 83.87(14)  | O(11)-Dy(3)-O(7)  | 69.22(14)  |
| O(5)-Dy(2)-O(2)   | 74.88(14)  | O(47)-Dy(3)-O(30) | 74.26(16)  |
| O(3)-Dy(2)-O(2)   | 131.15(13) | O(61)-Dy(3)-O(30) | 73.53(17)  |
| O(7)-Dy(2)-O(10)  | 139.88(14) | O(24)-Dy(3)-O(30) | 126.50(16) |
| O(5)-Dy(2)-O(10)  | 72.41(13)  | O(8)-Dy(3)-O(30)  | 126.97(15) |
| O(3)-Dy(2)-O(10)  | 145.30(15) | O(48)-Dy(3)-O(30) | 135.73(17) |
| O(2)-Dy(2)-O(10)  | 67.11(13)  | O(11)-Dy(3)-O(30) | 63.54(16)  |
| O(7)-Dy(2)-O(11)  | 71.07(14)  | O(7)-Dy(3)-O(30)  | 65.70(14)  |
| O(5)-Dy(2)-O(11)  | 140.83(15) | O(47)-Dy(3)-O(3)  | 140.19(14) |
| O(3)-Dy(2)-O(11)  | 66.89(14)  | O(61)-Dy(3)-O(3)  | 135.22(17) |
| O(2)-Dy(2)-O(11)  | 144.19(15) | O(24)-Dy(3)-O(3)  | 63.09(14)  |
| O(10)-Dy(2)-O(11) | 118.01(14) | O(8)-Dy(3)-O(3)   | 62.79(13)  |
| O(7)-Dy(2)-O(58)  | 145.05(14) | O(48)-Dy(3)-O(3)  | 106.81(16) |
| O(5)-Dy(2)-O(58)  | 76.55(14)  | O(11)-Dy(3)-O(3)  | 62.56(13)  |
| O(55)-Dy(4)-O(6)  | 81.14(14)  | O(7)-Dy(3)-O(3)   | 67.43(14)  |
| O(13)-Dy(4)-O(6)  | 65.75(14)  | O(30)-Dy(3)-O(3)  | 117.44(13) |
| O(16)-Dy(4)-O(6)  | 119.38(14) | O(67)-Dy(4)-O(33) | 79.63(17)  |
| O(70)-Dy(4)-O(6)  | 75.20(16)  | O(67)-Dy(4)-O(55) | 93.13(17)  |
| O(67)-Dy(4)-O(39) | 73.94(17)  | O(33)-Dy(4)-O(55) | 147.38(17) |
| O(33)-Dy(4)-O(39) | 134.54(15) | O(67)-Dy(4)-O(13) | 142.93(17) |
| O(55)-Dy(4)-O(39) | 71.21(15)  | O(33)-Dy(4)-O(13) | 123.70(15) |
| O(13)-Dy(4)-O(39) | 69.40(14)  | O(55)-Dy(4)-O(13) | 80.38(15)  |
| O(16)-Dy(4)-O(39) | 64.02(15)  | O(67)-Dy(4)-O(16) | 86.01(17)  |
| O(70)-Dy(4)-O(39) | 129.60(17) | O(33)-Dy(4)-O(16) | 78.02(16)  |
| O(6)-Dy(4)-O(39)  | 130.28(14) | O(55)-Dy(4)-O(16) | 133.60(16) |
| O(12)-Dy(5)-O(14) | 118.71(14) | O(13)-Dy(4)-O(16) | 73.36(14)  |
| O(12)-Dy(5)-O(52) | 85.85(15)  | O(67)-Dy(4)-O(70) | 74.69(18)  |
| O(14)-Dy(5)-O(52) | 136.15(16) | O(33)-Dy(4)-O(70) | 75.19(17)  |

---

---

|                   |            |                   |            |
|-------------------|------------|-------------------|------------|
| O(12)-Dy(5)-O(16) | 142.05(15) | O(55)-Dy(4)-O(70) | 72.22(17)  |
| O(14)-Dy(5)-O(16) | 71.26(15)  | O(13)-Dy(4)-O(70) | 135.06(16) |
| O(52)-Dy(5)-O(16) | 68.14(16)  | O(16)-Dy(4)-O(70) | 149.29(16) |
| O(12)-Dy(5)-O(17) | 72.27(14)  | O(67)-Dy(4)-O(6)  | 149.67(17) |
| O(14)-Dy(5)-O(17) | 142.90(15) | O(33)-Dy(4)-O(6)  | 89.26(15)  |
| O(52)-Dy(5)-O(17) | 76.46(16)  | O(17)-Dy(5)-O(13) | 141.22(15) |
| O(16)-Dy(5)-O(17) | 123.80(14) | O(50)-Dy(5)-O(13) | 146.52(15) |
| O(12)-Dy(5)-O(50) | 136.19(15) | O(15)-Dy(5)-O(13) | 123.14(13) |
| O(14)-Dy(5)-O(50) | 86.96(15)  | O(65)-Dy(6)-O(36) | 79.50(17)  |
| O(52)-Dy(5)-O(50) | 99.50(15)  | O(65)-Dy(6)-O(57) | 92.35(18)  |
| O(16)-Dy(5)-O(50) | 77.27(15)  | O(36)-Dy(6)-O(57) | 147.24(18) |
| O(17)-Dy(5)-O(50) | 67.03(15)  | O(65)-Dy(6)-O(15) | 143.62(16) |
| O(12)-Dy(5)-O(15) | 74.31(15)  | O(36)-Dy(6)-O(15) | 122.56(15) |
| O(14)-Dy(5)-O(15) | 78.58(15)  | O(57)-Dy(6)-O(15) | 82.07(17)  |
| O(52)-Dy(5)-O(15) | 145.25(16) | O(65)-Dy(6)-O(71) | 74.14(18)  |
| O(16)-Dy(5)-O(15) | 141.28(15) | O(36)-Dy(6)-O(71) | 74.44(18)  |
| O(17)-Dy(5)-O(15) | 70.49(14)  | O(57)-Dy(6)-O(71) | 72.82(19)  |
| O(50)-Dy(5)-O(15) | 77.44(14)  | O(15)-Dy(6)-O(71) | 136.05(16) |
| O(12)-Dy(5)-O(13) | 77.26(15)  | O(65)-Dy(6)-O(17) | 86.68(17)  |
| O(14)-Dy(5)-O(13) | 73.65(14)  | O(36)-Dy(6)-O(17) | 77.10(16)  |
| O(52)-Dy(5)-O(13) | 77.99(14)  | O(57)-Dy(6)-O(17) | 134.53(16) |
| O(16)-Dy(5)-O(13) | 70.80(14)  | O(15)-Dy(6)-O(17) | 72.80(15)  |
| O(12)-Mn(1)-O(18) | 86.06(18)  | O(71)-Dy(6)-O(17) | 148.02(18) |
| O(12)-Mn(1)-O(5)  | 175.56(18) | O(65)-Dy(6)-O(9)  | 149.54(16) |
| O(18)-Mn(1)-O(5)  | 91.35(18)  | O(36)-Dy(6)-O(9)  | 89.44(14)  |
| O(12)-Mn(1)-O(1)  | 94.87(18)  | O(57)-Dy(6)-O(9)  | 81.71(15)  |
| O(18)-Mn(1)-O(1)  | 178.65(18) | O(15)-Dy(6)-O(9)  | 65.39(14)  |
| O(5)-Mn(1)-O(1)   | 87.66(17)  | O(71)-Dy(6)-O(9)  | 75.57(16)  |
| O(12)-Mn(1)-O(9)  | 85.81(17)  | O(17)-Dy(6)-O(9)  | 118.60(14) |
| O(18)-Mn(1)-O(9)  | 92.11(18)  | O(65)-Dy(6)-O(42) | 74.39(17)  |
| O(5)-Mn(1)-O(9)   | 97.89(16)  | O(36)-Dy(6)-O(42) | 134.09(16) |
| O(1)-Mn(1)-O(9)   | 88.94(17)  | O(57)-Dy(6)-O(42) | 71.55(16)  |
| O(12)-Mn(1)-O(4)  | 96.40(17)  | O(15)-Dy(6)-O(42) | 69.73(15)  |
| O(18)-Mn(1)-O(4)  | 90.59(17)  | O(71)-Dy(6)-O(42) | 130.66(17) |
| O(5)-Mn(1)-O(4)   | 80.01(15)  | O(17)-Dy(6)-O(42) | 64.45(15)  |
| O(1)-Mn(1)-O(4)   | 88.33(16)  | O(9)-Dy(6)-O(42)  | 130.13(15) |
| O(9)-Mn(1)-O(4)   | 176.62(16) | O(8)-Mn(3)-O(1)   | 88.60(17)  |
| O(2)-Mn(2)-O(4)   | 88.60(17)  | O(9)-Mn(3)-O(1)   | 87.20(17)  |
| O(2)-Mn(2)-O(6)   | 94.57(18)  | O(15)-Mn(3)-O(1)  | 89.43(16)  |
| O(4)-Mn(2)-O(6)   | 175.16(18) | O(56)-Mn(3)-O(1)  | 166.65(16) |

---

|                   |            |                   |            |
|-------------------|------------|-------------------|------------|
| O(2)-Mn(2)-O(13)  | 173.71(17) | O(14)-Mn(4)-O(19) | 87.58(19)  |
| O(4)-Mn(2)-O(13)  | 91.70(18)  | O(14)-Mn(4)-O(7)  | 175.57(18) |
| O(6)-Mn(2)-O(13)  | 84.75(18)  | O(19)-Mn(4)-O(7)  | 90.30(19)  |
| O(2)-Mn(2)-O(54)  | 84.02(16)  | O(14)-Mn(4)-O(1)  | 94.23(18)  |
| O(4)-Mn(2)-O(54)  | 95.78(17)  | O(19)-Mn(4)-O(1)  | 177.91(18) |
| O(6)-Mn(2)-O(54)  | 88.21(17)  | O(7)-Mn(4)-O(1)   | 87.82(18)  |
| O(13)-Mn(2)-O(54) | 102.20(16) | O(14)-Mn(4)-O(6)  | 85.39(17)  |
| O(2)-Mn(2)-O(1)   | 84.46(15)  | O(19)-Mn(4)-O(6)  | 92.13(18)  |
| O(4)-Mn(2)-O(1)   | 88.97(16)  | O(7)-Mn(4)-O(6)   | 98.59(16)  |
| O(6)-Mn(2)-O(1)   | 87.69(16)  | O(1)-Mn(4)-O(6)   | 89.07(16)  |
| O(13)-Mn(2)-O(1)  | 89.26(16)  | O(14)-Mn(4)-O(8)  | 96.39(17)  |
| O(54)-Mn(2)-O(1)  | 167.42(16) | O(19)-Mn(4)-O(8)  | 91.30(18)  |
| O(3)-Mn(3)-O(8)   | 88.17(19)  | O(7)-Mn(4)-O(8)   | 79.76(16)  |
| O(3)-Mn(3)-O(9)   | 95.48(19)  | O(1)-Mn(4)-O(8)   | 87.46(16)  |
| O(8)-Mn(3)-O(9)   | 174.15(19) | O(6)-Mn(4)-O(8)   | 176.21(16) |
| O(3)-Mn(3)-O(15)  | 174.12(17) | O(21)-Mn(5)-O(2)  | 89.59(18)  |
| O(8)-Mn(3)-O(15)  | 91.87(19)  | O(21)-Mn(5)-O(20) | 173.12(18) |
| O(9)-Mn(3)-O(15)  | 84.03(19)  | O(2)-Mn(5)-O(20)  | 97.09(17)  |
| O(3)-Mn(3)-O(56)  | 83.63(17)  | O(21)-Mn(5)-N(1)  | 83.3(2)    |
| O(8)-Mn(3)-O(56)  | 97.46(19)  | O(2)-Mn(5)-N(1)   | 170.0(2)   |
| O(9)-Mn(3)-O(56)  | 87.51(19)  | O(20)-Mn(5)-N(1)  | 89.9(2)    |
| O(15)-Mn(3)-O(56) | 102.19(17) | O(21)-Mn(5)-O(63) | 90.14(17)  |
| O(3)-Mn(3)-O(1)   | 84.69(16)  | O(2)-Mn(5)-O(63)  | 96.23(16)  |
| O(3)-Mn(6)-O(23)  | 97.12(19)  | O(20)-Mn(5)-O(63) | 90.79(18)  |
| O(24)-Mn(6)-N(2)  | 83.4(2)    | N(1)-Mn(5)-O(63)  | 90.82(18)  |
| O(3)-Mn(6)-N(2)   | 170.7(2)   | O(21)-Mn(5)-O(54) | 89.58(17)  |
| O(23)-Mn(6)-N(2)  | 89.9(2)    | O(2)-Mn(5)-O(54)  | 79.83(16)  |
| O(24)-Mn(6)-O(59) | 89.3(2)    | O(20)-Mn(5)-O(54) | 89.96(17)  |
| O(3)-Mn(6)-O(59)  | 95.90(17)  | N(1)-Mn(5)-O(54)  | 93.07(18)  |
| O(23)-Mn(6)-O(59) | 91.1(2)    | O(63)-Mn(5)-O(54) | 176.05(16) |
| N(2)-Mn(6)-O(59)  | 90.0(2)    | O(24)-Mn(6)-O(3)  | 89.5(2)    |
| O(24)-Mn(6)-O(56) | 90.01(19)  | O(24)-Mn(6)-O(23) | 173.3(2)   |
| O(3)-Mn(6)-O(56)  | 80.26(16)  | O(11)-Mn(8)-O(60) | 94.96(19)  |
| O(23)-Mn(6)-O(56) | 90.06(19)  | N(4)-Mn(8)-O(60)  | 87.8(2)    |
| N(2)-Mn(6)-O(56)  | 93.7(2)    | O(29)-Mn(8)-O(62) | 89.16(18)  |
| O(59)-Mn(6)-O(56) | 176.10(17) | O(30)-Mn(8)-O(62) | 87.72(18)  |
| O(27)-Mn(7)-O(26) | 174.4(2)   | O(11)-Mn(8)-O(62) | 73.67(16)  |
| O(27)-Mn(7)-O(10) | 86.31(18)  | N(4)-Mn(8)-O(62)  | 103.7(2)   |
| O(26)-Mn(7)-O(10) | 97.22(19)  | O(60)-Mn(8)-O(62) | 168.48(18) |
| O(27)-Mn(7)-N(3)  | 84.3(2)    | O(14)-Mn(9)-O(33) | 89.32(19)  |

|                    |            |                    |            |
|--------------------|------------|--------------------|------------|
| O(26)-Mn(7)-N(3)   | 91.9(2)    | O(14)-Mn(9)-O(32)  | 97.5(2)    |
| O(10)-Mn(7)-N(3)   | 169.9(2)   | O(33)-Mn(9)-O(32)  | 173.1(2)   |
| O(27)-Mn(7)-O(68)  | 92.6(2)    | O(14)-Mn(9)-N(5)   | 172.2(2)   |
| O(26)-Mn(7)-O(68)  | 91.4(2)    | O(33)-Mn(9)-N(5)   | 84.0(2)    |
| O(10)-Mn(7)-O(68)  | 96.37(18)  | O(32)-Mn(9)-N(5)   | 89.2(2)    |
| N(3)-Mn(7)-O(68)   | 87.7(2)    | O(14)-Mn(9)-O(19)  | 78.76(17)  |
| O(27)-Mn(7)-O(58)  | 87.15(18)  | O(33)-Mn(9)-O(19)  | 90.28(18)  |
| O(26)-Mn(7)-O(58)  | 89.69(18)  | O(32)-Mn(9)-O(19)  | 91.87(18)  |
| O(10)-Mn(7)-O(58)  | 73.38(16)  | N(5)-Mn(9)-O(19)   | 97.1(2)    |
| N(3)-Mn(7)-O(58)   | 102.5(2)   | O(14)-Mn(9)-O(51)  | 92.00(17)  |
| O(68)-Mn(7)-O(58)  | 169.75(17) | O(33)-Mn(9)-O(51)  | 91.63(19)  |
| O(29)-Mn(8)-O(30)  | 173.8(2)   | O(32)-Mn(9)-O(51)  | 87.31(19)  |
| O(29)-Mn(8)-O(11)  | 97.7(2)    | N(5)-Mn(9)-O(51)   | 92.3(2)    |
| O(30)-Mn(8)-O(11)  | 86.6(2)    | O(19)-Mn(9)-O(51)  | 170.55(18) |
| O(29)-Mn(8)-N(4)   | 91.2(2)    | O(12)-Mn(10)-O(36) | 89.75(19)  |
| O(30)-Mn(8)-N(4)   | 84.4(2)    | O(12)-Mn(10)-O(35) | 97.25(19)  |
| O(11)-Mn(8)-N(4)   | 170.7(2)   | O(36)-Mn(10)-O(35) | 172.6(2)   |
| O(29)-Mn(8)-O(60)  | 90.6(2)    | O(12)-Mn(10)-N(6)  | 172.5(2)   |
| O(30)-Mn(8)-O(60)  | 93.5(2)    | O(36)-Mn(10)-N(6)  | 83.5(2)    |
| O(18)-Mn(10)-O(53) | 170.84(18) | O(35)-Mn(10)-N(6)  | 89.7(2)    |
| O(39)-Mn(11)-O(38) | 174.3(2)   | O(12)-Mn(10)-O(18) | 78.74(17)  |
| O(39)-Mn(11)-O(16) | 85.21(19)  | O(36)-Mn(10)-O(18) | 92.08(18)  |
| O(38)-Mn(11)-O(16) | 98.8(2)    | O(35)-Mn(10)-O(18) | 91.69(17)  |
| O(39)-Mn(11)-N(7)  | 84.5(2)    | N(6)-Mn(10)-O(18)  | 98.4(2)    |
| O(38)-Mn(11)-N(7)  | 91.2(2)    | O(12)-Mn(10)-O(53) | 92.18(17)  |
| O(16)-Mn(11)-N(7)  | 169.0(2)   | O(36)-Mn(10)-O(53) | 89.03(18)  |
| O(39)-Mn(11)-O(66) | 92.9(2)    | O(35)-Mn(10)-O(53) | 88.25(18)  |
| O(38)-Mn(11)-O(66) | 90.7(2)    | N(6)-Mn(10)-O(53)  | 90.8(2)    |
| O(16)-Mn(11)-O(66) | 96.1(2)    | Mn(3)-O(1)-Mn(2)   | 175.1(2)   |
| N(7)-Mn(11)-O(66)  | 88.3(2)    | Mn(1)-O(1)-Dy(2)   | 96.19(15)  |
| O(39)-Mn(11)-O(52) | 88.33(18)  | Mn(4)-O(1)-Dy(2)   | 95.37(15)  |
| O(38)-Mn(11)-O(52) | 88.78(19)  | Mn(3)-O(1)-Dy(2)   | 92.47(13)  |
| O(16)-Mn(11)-O(52) | 74.90(18)  | Mn(2)-O(1)-Dy(2)   | 92.39(13)  |
| N(7)-Mn(11)-O(52)  | 101.0(2)   | Mn(2)-O(2)-Mn(5)   | 108.37(19) |
| O(66)-Mn(11)-O(52) | 170.75(18) | Mn(2)-O(2)-Dy(2)   | 117.66(17) |
| O(42)-Mn(12)-O(41) | 174.9(2)   | Mn(5)-O(2)-Dy(2)   | 130.51(19) |
| O(42)-Mn(12)-O(17) | 85.85(19)  | Mn(2)-O(2)-Dy(1)   | 98.51(16)  |
| O(41)-Mn(12)-O(17) | 98.8(2)    | Mn(5)-O(2)-Dy(1)   | 96.76(15)  |
| O(42)-Mn(12)-N(8)  | 84.3(2)    | Dy(2)-O(2)-Dy(1)   | 93.66(13)  |
| O(41)-Mn(12)-N(8)  | 91.0(2)    | Mn(3)-O(3)-Mn(6)   | 108.5(2)   |

---

|                    |            |                    |            |
|--------------------|------------|--------------------|------------|
| O(17)-Mn(12)-N(8)  | 169.9(2)   | Mn(3)-O(3)-Dy(2)   | 117.17(18) |
| O(42)-Mn(12)-O(64) | 91.3(2)    | Mn(6)-O(3)-Dy(2)   | 130.52(19) |
| O(41)-Mn(12)-O(64) | 90.4(2)    | Mn(3)-O(3)-Dy(3)   | 97.87(17)  |
| O(17)-Mn(12)-O(64) | 95.6(2)    | Mn(6)-O(3)-Dy(3)   | 97.39(16)  |
| N(8)-Mn(12)-O(64)  | 86.7(2)    | Dy(2)-O(3)-Dy(3)   | 94.42(14)  |
| O(42)-Mn(12)-O(50) | 89.51(19)  | Mn(2)-O(4)-Mn(1)   | 92.24(16)  |
| O(41)-Mn(12)-O(50) | 89.6(2)    | Mn(2)-O(4)-Dy(1)   | 108.71(17) |
| O(17)-Mn(12)-O(50) | 75.54(17)  | Mn(1)-O(4)-Dy(1)   | 101.45(15) |
| N(8)-Mn(12)-O(50)  | 102.3(2)   | Mn(1)-O(5)-Dy(2)   | 111.93(19) |
| O(64)-Mn(12)-O(50) | 171.02(17) | Mn(1)-O(5)-Dy(1)   | 107.59(17) |
| Mn(1)-O(1)-Mn(4)   | 168.4(2)   | Dy(2)-O(5)-Dy(1)   | 100.73(14) |
| Mn(1)-O(1)-Mn(3)   | 90.01(16)  | Mn(2)-O(6)-Mn(4)   | 93.93(18)  |
| Mn(4)-O(1)-Mn(3)   | 90.15(15)  | Mn(2)-O(6)-Dy(4)   | 100.30(18) |
| Mn(1)-O(1)-Mn(2)   | 89.55(15)  | Mn(4)-O(6)-Dy(4)   | 110.23(16) |
| Mn(4)-O(1)-Mn(2)   | 89.32(16)  | Mn(4)-O(7)-Dy(2)   | 112.3(2)   |
| Mn(7)-O(10)-Dy(1)  | 101.06(17) | Mn(4)-O(7)-Dy(3)   | 107.41(17) |
| Dy(2)-O(10)-Dy(1)  | 98.97(14)  | Dy(2)-O(7)-Dy(3)   | 101.51(16) |
| Mn(8)-O(11)-Dy(3)  | 101.10(19) | Dy(6)-O(17)-Dy(5)  | 101.09(15) |
| Mn(8)-O(11)-Dy(2)  | 121.2(2)   | Mn(3)-O(8)-Mn(4)   | 93.01(17)  |
| Dy(3)-O(11)-Dy(2)  | 99.35(15)  | Mn(3)-O(8)-Dy(3)   | 109.28(19) |
| Mn(1)-O(12)-Mn(10) | 102.8(2)   | Mn(4)-O(8)-Dy(3)   | 101.80(16) |
| Mn(1)-O(12)-Dy(5)  | 121.4(2)   | Mn(3)-O(9)-Mn(1)   | 93.85(18)  |
| Mn(10)-O(12)-Dy(5) | 133.7(2)   | Mn(3)-O(9)-Dy(6)   | 100.12(18) |
| Mn(2)-O(13)-Dy(4)  | 101.51(18) | Mn(1)-O(9)-Dy(6)   | 111.29(17) |
| Mn(2)-O(13)-Dy(5)  | 121.56(19) | Mn(7)-O(10)-Dy(2)  | 121.62(19) |
| Dy(4)-O(13)-Dy(5)  | 100.62(15) | Mn(5)-O(21)-Dy(1)  | 109.79(18) |
| Mn(4)-O(14)-Mn(9)  | 102.0(2)   | Mn(6)-O(24)-Dy(3)  | 109.99(19) |
| Mn(4)-O(14)-Dy(5)  | 122.0(2)   | Mn(7)-O(27)-Dy(1)  | 100.46(19) |
| Mn(9)-O(14)-Dy(5)  | 133.0(2)   | Mn(8)-O(30)-Dy(3)  | 99.8(2)    |
| Mn(3)-O(15)-Dy(6)  | 102.04(19) | Mn(9)-O(33)-Dy(4)  | 116.3(2)   |
| Mn(3)-O(15)-Dy(5)  | 121.47(18) | Mn(10)-O(36)-Dy(6) | 117.3(2)   |
| Dy(6)-O(15)-Dy(5)  | 101.65(16) | Mn(11)-O(39)-Dy(4) | 101.6(2)   |
| Mn(11)-O(16)-Dy(4) | 102.04(19) | Mn(12)-O(42)-Dy(6) | 101.4(2)   |
| Mn(11)-O(16)-Dy(5) | 117.7(2)   | Mn(12)-O(50)-Dy(5) | 100.19(17) |
| Dy(4)-O(16)-Dy(5)  | 101.24(15) | Mn(2)-O(54)-Mn(5)  | 85.21(14)  |
| Mn(12)-O(17)-Dy(6) | 101.98(19) | Mn(3)-O(56)-Mn(6)  | 85.30(15)  |
| Mn(12)-O(17)-Dy(5) | 117.2(2)   | Dy(2)-O(58)-Mn(7)  | 98.79(15)  |
| Mn(1)-O(18)-Mn(10) | 91.02(17)  | Dy(2)-O(62)-Mn(8)  | 99.10(15)  |
| Mn(4)-O(19)-Mn(9)  | 89.84(18)  |                    |            |

---

---

2-Y

|            |          |             |           |
|------------|----------|-------------|-----------|
| Y(1)-O(44) | 2.263(8) | Mn(2)-O(54) | 2.193(6)  |
| Y(1)-O(69) | 2.324(7) | Mn(2)-O(1)  | 2.280(6)  |
| Y(1)-O(21) | 2.333(6) | Mn(3)-O(3)  | 1.886(6)  |
| Y(1)-O(4)  | 2.374(6) | Mn(3)-O(8)  | 1.899(8)  |
| Y(1)-O(45) | 2.385(8) | Mn(3)-O(15) | 1.952(6)  |
| Y(1)-O(10) | 2.417(7) | Mn(3)-O(9)  | 1.956(7)  |
| Y(1)-O(5)  | 2.466(7) | Mn(3)-O(56) | 2.202(7)  |
| Y(1)-O(27) | 2.491(6) | Mn(3)-O(1)  | 2.290(6)  |
| Y(1)-O(2)  | 2.702(7) | Mn(4)-O(14) | 1.850(6)  |
| Y(2)-O(5)  | 2.326(8) | Mn(4)-O(19) | 1.921(7)  |
| Y(2)-O(7)  | 2.344(7) | Mn(4)-O(7)  | 1.968(6)  |
| Y(2)-O(2)  | 2.389(6) | Mn(4)-O(1)  | 1.988(7)  |
| Y(2)-O(3)  | 2.409(6) | Mn(4)-O(6)  | 2.213(6)  |
| Y(2)-O(11) | 2.446(8) | Mn(4)-O(8)  | 2.260(6)  |
| Y(2)-O(10) | 2.459(6) | Mn(5)-O(21) | 1.896(7)  |
| Y(2)-O(58) | 2.474(6) | Mn(5)-O(2)  | 1.899(5)  |
| Y(2)-O(62) | 2.487(7) | Mn(5)-O(20) | 1.925(7)  |
| Y(2)-O(1)  | 2.766(5) | Mn(5)-N(1)  | 1.991(8)  |
| Y(3)-O(61) | 2.286(9) | Mn(5)-O(63) | 2.235(7)  |
| Y(3)-O(47) | 2.319(9) | Mn(5)-O(54) | 2.302(6)  |
| Y(3)-O(24) | 2.334(7) | Mn(6)-O(3)  | 1.882(6)  |
| Y(3)-O(8)  | 2.376(7) | Mn(6)-O(24) | 1.886(10) |
| Y(3)-O(48) | 2.382(7) | Mn(6)-O(23) | 1.920(9)  |
| Y(3)-O(11) | 2.434(6) | Mn(6)-N(2)  | 2.007(9)  |
| Y(3)-O(7)  | 2.474(6) | Mn(6)-O(59) | 2.221(6)  |
| Y(3)-O(30) | 2.500(7) | Mn(6)-O(56) | 2.310(6)  |
| Y(3)-O(3)  | 2.711(9) | Mn(7)-O(27) | 1.847(7)  |
| Y(4)-O(67) | 2.266(6) | Mn(7)-O(26) | 1.856(7)  |
| Y(4)-O(55) | 2.292(7) | Mn(7)-O(10) | 1.907(6)  |
| Y(4)-O(33) | 2.335(8) | Mn(7)-N(3)  | 1.936(8)  |
| Y(4)-O(13) | 2.371(6) | Mn(7)-O(68) | 2.184(8)  |
| Y(4)-O(70) | 2.400(6) | Mn(7)-O(58) | 2.530(8)  |
| Y(4)-O(16) | 2.402(5) | Mn(8)-O(30) | 1.882(7)  |
| Y(4)-O(6)  | 2.412(6) | Mn(8)-O(29) | 1.886(7)  |
| Y(4)-O(39) | 2.456(8) | Mn(8)-O(11) | 1.942(7)  |
| Y(5)-O(12) | 2.239(6) | Mn(8)-N(4)  | 1.964(10) |
| Y(5)-O(14) | 2.250(7) | Mn(8)-O(60) | 2.188(8)  |
| Y(5)-O(17) | 2.413(6) | Mn(8)-O(62) | 2.522(8)  |
| Y(5)-O(52) | 2.426(8) | Mn(9)-O(14) | 1.901(7)  |

---



|                  |          |                  |           |
|------------------|----------|------------------|-----------|
| Y(5)-O(50)       | 2.441(7) | Mn(9)-O(33)      | 1.919(6)  |
| Y(5)-O(16)       | 2.444(5) | Mn(9)-O(32)      | 1.927(7)  |
| Y(5)-O(15)       | 2.460(6) | Mn(9)-N(5)       | 1.977(10) |
| Y(5)-O(13)       | 2.473(6) | Mn(9)-O(51)      | 2.231(6)  |
| Y(6)-O(65)       | 2.298(6) | Mn(9)-O(19)      | 2.232(6)  |
| Y(6)-O(57)       | 2.321(9) | Mn(10)-O(36)     | 1.897(6)  |
| Y(6)-O(36)       | 2.328(9) | Mn(10)-O(12)     | 1.904(7)  |
| Y(6)-O(1W)       | 2.413(7) | Mn(10)-O(35)     | 1.918(8)  |
| Y(6)-O(15)       | 2.413(7) | Mn(10)-N(6)      | 1.956(11) |
| Y(6)-O(17)       | 2.420(6) | Mn(10)-O(18)     | 2.195(6)  |
| Y(6)-O(9)        | 2.421(5) | Mn(10)-O(53)     | 2.271(6)  |
| Y(6)-O(42)       | 2.456(7) | Mn(11)-O(38)     | 1.869(6)  |
| Mn(1)-O(12)      | 1.867(6) | Mn(11)-O(39)     | 1.879(6)  |
| Mn(1)-O(18)      | 1.936(8) | Mn(11)-O(16)     | 1.939(7)  |
| Mn(1)-O(1)       | 1.967(7) | Mn(11)-N(7)      | 1.968(9)  |
| Mn(1)-O(5)       | 1.974(6) | Mn(11)-O(66)     | 2.185(7)  |
| Mn(1)-O(9)       | 2.183(6) | Mn(12)-O(42)     | 1.851(7)  |
| Mn(1)-O(4)       | 2.244(6) | Mn(12)-O(41)     | 1.886(7)  |
| Mn(2)-O(2)       | 1.884(5) | Mn(12)-O(17)     | 1.951(6)  |
| Mn(2)-O(4)       | 1.908(7) | Mn(12)-N(8)      | 1.976(9)  |
| Mn(2)-O(6)       | 1.961(7) | Mn(12)-O(64)     | 2.166(8)  |
| Mn(2)-O(13)      | 1.970(5) | Mn(12)-O(50)     | 2.456(7)  |
| O(44)-Y(1)-O(69) | 85.1(3)  | O(45)-Y(1)-O(5)  | 138.8(2)  |
| O(44)-Y(1)-O(21) | 144.8(3) | O(10)-Y(1)-O(5)  | 70.0(2)   |
| O(69)-Y(1)-O(21) | 75.8(2)  | O(44)-Y(1)-O(27) | 75.1(2)   |
| O(44)-Y(1)-O(4)  | 79.0(2)  | O(69)-Y(1)-O(27) | 72.6(2)   |
| O(69)-Y(1)-O(4)  | 146.8(3) | O(21)-Y(1)-O(27) | 124.6(2)  |
| O(21)-Y(1)-O(4)  | 101.4(2) | O(4)-Y(1)-O(27)  | 129.2(2)  |
| O(44)-Y(1)-O(45) | 72.5(3)  | O(45)-Y(1)-O(27) | 134.4(3)  |
| O(69)-Y(1)-O(45) | 73.5(3)  | O(10)-Y(1)-O(27) | 62.6(2)   |
| O(21)-Y(1)-O(45) | 73.9(2)  | O(5)-Y(1)-O(27)  | 66.8(2)   |
| O(4)-Y(1)-O(45)  | 74.0(2)  | O(44)-Y(1)-O(2)  | 138.5(2)  |
| O(44)-Y(1)-O(10) | 136.4(2) | O(69)-Y(1)-O(2)  | 135.9(2)  |
| O(69)-Y(1)-O(10) | 91.5(2)  | O(21)-Y(1)-O(2)  | 63.46(19) |
| O(21)-Y(1)-O(10) | 74.2(2)  | O(4)-Y(1)-O(2)   | 62.5(2)   |
| O(4)-Y(1)-O(10)  | 120.0(2) | O(45)-Y(1)-O(2)  | 108.3(2)  |
| O(45)-Y(1)-O(10) | 147.1(2) | O(10)-Y(1)-O(2)  | 62.76(19) |
| O(44)-Y(1)-O(5)  | 84.9(3)  | O(5)-Y(1)-O(2)   | 67.5(2)   |
| O(69)-Y(1)-O(5)  | 139.4(2) | O(27)-Y(1)-O(2)  | 117.2(2)  |
| O(21)-Y(1)-O(5)  | 128.4(2) | O(5)-Y(2)-O(7)   | 128.1(2)  |

|                  |            |                  |            |
|------------------|------------|------------------|------------|
| O(4)-Y(1)-O(5)   | 68.1(2)    | O(5)-Y(2)-O(2)   | 75.3(2)    |
| O(11)-Y(2)-O(58) | 74.4(3)    | O(7)-Y(2)-O(2)   | 83.4(2)    |
| O(10)-Y(2)-O(58) | 66.3(2)    | O(5)-Y(2)-O(3)   | 83.6(3)    |
| O(5)-Y(2)-O(62)  | 145.4(2)   | O(7)-Y(2)-O(3)   | 75.7(2)    |
| O(7)-Y(2)-O(62)  | 74.9(2)    | O(2)-Y(2)-O(3)   | 130.99(19) |
| O(2)-Y(2)-O(62)  | 83.7(2)    | O(5)-Y(2)-O(11)  | 140.0(2)   |
| O(3)-Y(2)-O(62)  | 130.3(3)   | O(7)-Y(2)-O(11)  | 71.2(2)    |
| O(11)-Y(2)-O(62) | 66.4(2)    | O(2)-Y(2)-O(11)  | 144.6(2)   |
| O(10)-Y(2)-O(62) | 75.0(2)    | O(3)-Y(2)-O(11)  | 66.7(2)    |
| O(58)-Y(2)-O(62) | 98.4(2)    | O(5)-Y(2)-O(10)  | 71.6(2)    |
| O(5)-Y(2)-O(1)   | 63.72(19)  | O(7)-Y(2)-O(10)  | 139.6(2)   |
| O(7)-Y(2)-O(1)   | 64.3(2)    | O(2)-Y(2)-O(10)  | 67.01(19)  |
| O(2)-Y(2)-O(1)   | 65.28(17)  | O(3)-Y(2)-O(10)  | 144.6(2)   |
| O(3)-Y(2)-O(1)   | 65.71(19)  | O(11)-Y(2)-O(10) | 118.9(2)   |
| O(11)-Y(2)-O(1)  | 120.6(2)   | O(5)-Y(2)-O(58)  | 76.4(2)    |
| O(10)-Y(2)-O(1)  | 120.6(2)   | O(7)-Y(2)-O(58)  | 144.8(3)   |
| O(58)-Y(2)-O(1)  | 131.3(2)   | O(2)-Y(2)-O(58)  | 130.9(2)   |
| O(62)-Y(2)-O(1)  | 130.34(19) | O(3)-Y(2)-O(58)  | 83.8(2)    |
| O(61)-Y(3)-O(47) | 84.8(3)    | O(48)-Y(3)-O(7)  | 139.1(2)   |
| O(61)-Y(3)-O(24) | 75.5(3)    | O(11)-Y(3)-O(7)  | 69.3(2)    |
| O(47)-Y(3)-O(24) | 143.5(3)   | O(61)-Y(3)-O(30) | 74.2(3)    |
| O(61)-Y(3)-O(8)  | 147.5(2)   | O(47)-Y(3)-O(30) | 74.1(2)    |
| O(47)-Y(3)-O(8)  | 80.4(3)    | O(24)-Y(3)-O(30) | 127.0(2)   |
| O(24)-Y(3)-O(8)  | 100.2(2)   | O(8)-Y(3)-O(30)  | 127.8(2)   |
| O(61)-Y(3)-O(48) | 75.0(3)    | O(48)-Y(3)-O(30) | 136.7(3)   |
| O(47)-Y(3)-O(48) | 73.4(3)    | O(11)-Y(3)-O(30) | 64.2(2)    |
| O(24)-Y(3)-O(48) | 72.0(3)    | O(7)-Y(3)-O(30)  | 65.2(2)    |
| O(8)-Y(3)-O(48)  | 73.0(3)    | O(61)-Y(3)-O(3)  | 134.2(3)   |
| O(61)-Y(3)-O(11) | 91.3(3)    | O(47)-Y(3)-O(3)  | 140.3(2)   |
| O(47)-Y(3)-O(11) | 137.5(2)   | O(24)-Y(3)-O(3)  | 62.2(3)    |
| O(24)-Y(3)-O(11) | 74.2(2)    | O(8)-Y(3)-O(3)   | 62.2(2)    |
| O(8)-Y(3)-O(11)  | 118.9(3)   | O(48)-Y(3)-O(3)  | 105.4(3)   |
| O(48)-Y(3)-O(11) | 145.8(3)   | O(11)-Y(3)-O(3)  | 62.2(2)    |
| O(61)-Y(3)-O(7)  | 139.4(2)   | O(7)-Y(3)-O(3)   | 68.3(2)    |
| O(47)-Y(3)-O(7)  | 86.7(3)    | O(30)-Y(3)-O(3)  | 117.9(2)   |
| O(24)-Y(3)-O(7)  | 127.9(3)   | O(67)-Y(4)-O(55) | 93.9(2)    |
| O(8)-Y(3)-O(7)   | 68.6(2)    | O(67)-Y(4)-O(33) | 79.5(3)    |
| O(70)-Y(4)-O(6)  | 74.5(2)    | O(55)-Y(4)-O(33) | 148.5(2)   |
| O(16)-Y(4)-O(6)  | 118.85(18) | O(67)-Y(4)-O(13) | 143.4(2)   |
| O(67)-Y(4)-O(39) | 74.0(2)    | O(55)-Y(4)-O(13) | 80.1(2)    |

|                  |            |                  |            |
|------------------|------------|------------------|------------|
| O(55)-Y(4)-O(39) | 71.0(2)    | O(33)-Y(4)-O(13) | 122.8(2)   |
| O(33)-Y(4)-O(39) | 134.2(2)   | O(67)-Y(4)-O(70) | 74.6(2)    |
| O(13)-Y(4)-O(39) | 69.9(2)    | O(55)-Y(4)-O(70) | 73.2(2)    |
| O(70)-Y(4)-O(39) | 129.8(2)   | O(33)-Y(4)-O(70) | 75.3(2)    |
| O(16)-Y(4)-O(39) | 64.2(2)    | O(13)-Y(4)-O(70) | 135.31(19) |
| O(6)-Y(4)-O(39)  | 131.7(2)   | O(67)-Y(4)-O(16) | 86.62(19)  |
| O(12)-Y(5)-O(14) | 117.1(2)   | O(55)-Y(4)-O(16) | 133.1(3)   |
| O(12)-Y(5)-O(17) | 72.5(2)    | O(33)-Y(4)-O(16) | 77.7(2)    |
| O(14)-Y(5)-O(17) | 142.2(2)   | O(13)-Y(4)-O(16) | 72.6(2)    |
| O(12)-Y(5)-O(52) | 86.1(2)    | O(70)-Y(4)-O(16) | 149.4(2)   |
| O(14)-Y(5)-O(52) | 137.8(2)   | O(67)-Y(4)-O(6)  | 148.7(2)   |
| O(17)-Y(5)-O(52) | 76.2(2)    | O(55)-Y(4)-O(6)  | 81.7(2)    |
| O(12)-Y(5)-O(50) | 136.8(2)   | O(33)-Y(4)-O(6)  | 88.2(2)    |
| O(14)-Y(5)-O(50) | 86.8(2)    | O(13)-Y(4)-O(6)  | 66.6(2)    |
| O(17)-Y(5)-O(50) | 67.7(2)    | O(15)-Y(5)-O(13) | 123.29(19) |
| O(52)-Y(5)-O(50) | 99.8(2)    | O(65)-Y(6)-O(57) | 92.4(3)    |
| O(12)-Y(5)-O(16) | 142.3(2)   | O(65)-Y(6)-O(36) | 80.1(3)    |
| O(14)-Y(5)-O(16) | 72.3(2)    | O(57)-Y(6)-O(36) | 147.4(3)   |
| O(17)-Y(5)-O(16) | 124.27(18) | O(65)-Y(6)-O(1W) | 73.8(2)    |
| O(52)-Y(5)-O(16) | 68.8(2)    | O(57)-Y(6)-O(1W) | 72.7(3)    |
| O(50)-Y(5)-O(16) | 77.1(2)    | O(36)-Y(6)-O(1W) | 74.8(3)    |
| O(12)-Y(5)-O(15) | 74.4(2)    | O(65)-Y(6)-O(15) | 143.2(3)   |
| O(14)-Y(5)-O(15) | 76.7(2)    | O(57)-Y(6)-O(15) | 82.3(3)    |
| O(17)-Y(5)-O(15) | 70.9(2)    | O(36)-Y(6)-O(15) | 121.9(2)   |
| O(52)-Y(5)-O(15) | 145.5(2)   | O(1W)-Y(6)-O(15) | 136.8(2)   |
| O(50)-Y(5)-O(15) | 77.4(2)    | O(65)-Y(6)-O(17) | 87.9(2)    |
| O(16)-Y(5)-O(15) | 140.5(3)   | O(57)-Y(6)-O(17) | 135.2(3)   |
| O(12)-Y(5)-O(13) | 77.6(2)    | O(36)-Y(6)-O(17) | 76.6(2)    |
| O(14)-Y(5)-O(13) | 73.8(2)    | O(1W)-Y(6)-O(17) | 148.2(3)   |
| O(17)-Y(5)-O(13) | 141.5(3)   | O(15)-Y(6)-O(17) | 71.6(2)    |
| O(52)-Y(5)-O(13) | 78.1(2)    | O(65)-Y(6)-O(9)  | 149.1(2)   |
| O(50)-Y(5)-O(13) | 145.6(2)   | O(57)-Y(6)-O(9)  | 81.6(2)    |
| O(16)-Y(5)-O(13) | 70.13(19)  | O(36)-Y(6)-O(9)  | 88.6(2)    |
| O(18)-Mn(1)-O(9) | 91.3(3)    | O(1W)-Y(6)-O(9)  | 75.5(2)    |
| O(1)-Mn(1)-O(9)  | 90.3(3)    | O(15)-Y(6)-O(9)  | 66.3(2)    |
| O(5)-Mn(1)-O(9)  | 98.6(2)    | O(17)-Y(6)-O(9)  | 117.53(18) |
| O(12)-Mn(1)-O(4) | 96.6(2)    | O(65)-Y(6)-O(42) | 74.0(3)    |
| O(18)-Mn(1)-O(4) | 90.4(3)    | O(57)-Y(6)-O(42) | 73.1(2)    |
| O(1)-Mn(1)-O(4)  | 87.9(3)    | O(36)-Y(6)-O(42) | 132.9(2)   |
| O(5)-Mn(1)-O(4)  | 79.7(2)    | O(1W)-Y(6)-O(42) | 131.2(2)   |

|                   |          |                   |          |
|-------------------|----------|-------------------|----------|
| O(9)-Mn(1)-O(4)   | 177.6(3) | O(15)-Y(6)-O(42)  | 69.7(2)  |
| O(3)-Mn(3)-O(8)   | 88.6(3)  | O(17)-Y(6)-O(42)  | 64.0(2)  |
| O(3)-Mn(3)-O(15)  | 173.6(3) | O(9)-Y(6)-O(42)   | 131.4(2) |
| O(8)-Mn(3)-O(15)  | 90.3(3)  | O(12)-Mn(1)-O(18) | 86.9(3)  |
| O(3)-Mn(3)-O(9)   | 95.6(3)  | O(12)-Mn(1)-O(1)  | 94.6(3)  |
| O(8)-Mn(3)-O(9)   | 173.9(3) | O(18)-Mn(1)-O(1)  | 177.8(2) |
| O(15)-Mn(3)-O(9)  | 85.1(3)  | O(12)-Mn(1)-O(5)  | 175.8(3) |
| O(3)-Mn(3)-O(56)  | 82.7(2)  | O(18)-Mn(1)-O(5)  | 91.4(3)  |
| O(8)-Mn(3)-O(56)  | 97.0(3)  | O(1)-Mn(1)-O(5)   | 87.0(3)  |
| O(15)-Mn(3)-O(56) | 103.7(2) | O(12)-Mn(1)-O(9)  | 85.2(2)  |
| O(9)-Mn(3)-O(56)  | 88.0(3)  | O(1)-Mn(4)-O(8)   | 87.2(3)  |
| O(3)-Mn(3)-O(1)   | 84.5(2)  | O(6)-Mn(4)-O(8)   | 177.1(3) |
| O(8)-Mn(3)-O(1)   | 88.5(3)  | O(21)-Mn(5)-O(2)  | 89.3(3)  |
| O(15)-Mn(3)-O(1)  | 89.2(2)  | O(21)-Mn(5)-O(20) | 173.6(3) |
| O(9)-Mn(3)-O(1)   | 87.5(3)  | O(2)-Mn(5)-O(20)  | 97.0(3)  |
| O(56)-Mn(3)-O(1)  | 165.9(2) | O(21)-Mn(5)-N(1)  | 84.5(3)  |
| O(14)-Mn(4)-O(19) | 88.2(3)  | O(2)-Mn(5)-N(1)   | 170.8(3) |
| O(14)-Mn(4)-O(7)  | 175.2(3) | O(20)-Mn(5)-N(1)  | 89.1(3)  |
| O(19)-Mn(4)-O(7)  | 89.4(3)  | O(21)-Mn(5)-O(63) | 89.5(3)  |
| O(14)-Mn(4)-O(1)  | 94.5(3)  | O(2)-Mn(5)-O(63)  | 95.9(2)  |
| O(19)-Mn(4)-O(1)  | 177.1(3) | O(20)-Mn(5)-O(63) | 91.0(3)  |
| O(7)-Mn(4)-O(1)   | 87.8(3)  | N(1)-Mn(5)-O(63)  | 90.8(3)  |
| O(14)-Mn(4)-O(6)  | 85.4(2)  | O(21)-Mn(5)-O(54) | 90.0(3)  |
| O(19)-Mn(4)-O(6)  | 91.2(3)  | O(2)-Mn(5)-O(54)  | 80.3(2)  |
| O(7)-Mn(4)-O(6)   | 98.8(2)  | O(20)-Mn(5)-O(54) | 89.9(3)  |
| O(1)-Mn(4)-O(6)   | 90.0(3)  | N(1)-Mn(5)-O(54)  | 92.9(3)  |
| O(14)-Mn(4)-O(8)  | 95.7(2)  | O(63)-Mn(5)-O(54) | 176.2(2) |
| O(19)-Mn(4)-O(8)  | 91.5(3)  | O(3)-Mn(6)-O(24)  | 88.3(3)  |
| O(7)-Mn(4)-O(8)   | 80.2(2)  | O(3)-Mn(6)-O(23)  | 96.9(3)  |
| O(26)-Mn(7)-N(3)  | 92.2(3)  | O(24)-Mn(6)-O(23) | 174.6(3) |
| O(10)-Mn(7)-N(3)  | 169.4(3) | O(3)-Mn(6)-N(2)   | 170.5(5) |
| O(27)-Mn(7)-O(68) | 92.5(3)  | O(24)-Mn(6)-N(2)  | 84.2(5)  |
| O(26)-Mn(7)-O(68) | 91.6(3)  | O(23)-Mn(6)-N(2)  | 90.4(5)  |
| O(10)-Mn(7)-O(68) | 95.3(3)  | O(3)-Mn(6)-O(59)  | 96.4(2)  |
| N(3)-Mn(7)-O(68)  | 87.1(3)  | O(24)-Mn(6)-O(59) | 88.9(3)  |
| O(27)-Mn(7)-O(58) | 87.2(3)  | O(23)-Mn(6)-O(59) | 92.0(3)  |
| O(26)-Mn(7)-O(58) | 89.6(3)  | N(2)-Mn(6)-O(59)  | 89.3(3)  |
| O(10)-Mn(7)-O(58) | 73.4(2)  | O(3)-Mn(6)-O(56)  | 79.9(2)  |
| N(3)-Mn(7)-O(58)  | 104.1(3) | O(24)-Mn(6)-O(56) | 88.6(3)  |
| O(68)-Mn(7)-O(58) | 168.7(2) | O(23)-Mn(6)-O(56) | 90.9(3)  |

|                    |          |                    |          |
|--------------------|----------|--------------------|----------|
| O(30)-Mn(8)-O(29)  | 173.4(3) | N(2)-Mn(6)-O(56)   | 94.0(3)  |
| O(30)-Mn(8)-O(11)  | 86.6(3)  | O(59)-Mn(6)-O(56)  | 175.6(3) |
| O(29)-Mn(8)-O(11)  | 97.4(3)  | O(27)-Mn(7)-O(26)  | 174.2(3) |
| O(30)-Mn(8)-N(4)   | 84.1(4)  | O(27)-Mn(7)-O(10)  | 85.6(3)  |
| O(29)-Mn(8)-N(4)   | 91.6(4)  | O(26)-Mn(7)-O(10)  | 98.0(3)  |
| O(11)-Mn(8)-N(4)   | 170.4(4) | O(27)-Mn(7)-N(3)   | 84.0(3)  |
| O(30)-Mn(8)-O(60)  | 94.3(3)  | O(14)-Mn(9)-O(19)  | 78.4(3)  |
| O(29)-Mn(8)-O(60)  | 90.6(3)  | O(33)-Mn(9)-O(19)  | 90.8(2)  |
| O(11)-Mn(8)-O(60)  | 95.3(3)  | O(32)-Mn(9)-O(19)  | 91.7(3)  |
| N(4)-Mn(8)-O(60)   | 87.9(4)  | N(5)-Mn(9)-O(19)   | 97.2(3)  |
| O(30)-Mn(8)-O(62)  | 87.0(3)  | O(51)-Mn(9)-O(19)  | 171.6(3) |
| O(29)-Mn(8)-O(62)  | 89.1(3)  | O(36)-Mn(10)-O(12) | 90.4(3)  |
| O(11)-Mn(8)-O(62)  | 73.1(3)  | O(36)-Mn(10)-O(35) | 171.2(4) |
| N(4)-Mn(8)-O(62)   | 103.8(4) | O(12)-Mn(10)-O(35) | 98.1(3)  |
| O(60)-Mn(8)-O(62)  | 168.3(3) | O(36)-Mn(10)-N(6)  | 83.0(4)  |
| O(14)-Mn(9)-O(33)  | 90.7(3)  | O(12)-Mn(10)-N(6)  | 172.6(4) |
| O(14)-Mn(9)-O(32)  | 96.5(3)  | O(35)-Mn(10)-N(6)  | 88.6(4)  |
| O(33)-Mn(9)-O(32)  | 172.8(4) | O(36)-Mn(10)-O(18) | 92.9(2)  |
| O(14)-Mn(9)-N(5)   | 172.4(3) | O(12)-Mn(10)-O(18) | 78.9(3)  |
| O(33)-Mn(9)-N(5)   | 83.1(4)  | O(35)-Mn(10)-O(18) | 90.9(3)  |
| O(32)-Mn(9)-N(5)   | 89.9(4)  | N(6)-Mn(10)-O(18)  | 97.9(3)  |
| O(14)-Mn(9)-O(51)  | 93.5(3)  | O(36)-Mn(10)-O(53) | 88.6(2)  |
| O(33)-Mn(9)-O(51)  | 91.6(3)  | O(12)-Mn(10)-O(53) | 92.5(3)  |
| O(32)-Mn(9)-O(51)  | 87.0(3)  | O(35)-Mn(10)-O(53) | 88.9(3)  |
| N(5)-Mn(9)-O(51)   | 91.1(3)  | N(6)-Mn(10)-O(53)  | 90.8(3)  |
| O(42)-Mn(12)-O(64) | 90.7(3)  | O(18)-Mn(10)-O(53) | 171.3(3) |
| O(41)-Mn(12)-O(64) | 90.6(3)  | O(38)-Mn(11)-O(39) | 174.1(4) |
| O(17)-Mn(12)-O(64) | 96.3(3)  | O(38)-Mn(11)-O(16) | 98.6(3)  |
| N(8)-Mn(12)-O(64)  | 86.4(4)  | O(39)-Mn(11)-O(16) | 85.1(3)  |
| O(42)-Mn(12)-O(50) | 90.0(3)  | O(38)-Mn(11)-N(7)  | 91.7(3)  |
| O(41)-Mn(12)-O(50) | 89.4(2)  | O(39)-Mn(11)-N(7)  | 84.2(3)  |
| O(17)-Mn(12)-O(50) | 74.7(3)  | O(16)-Mn(11)-N(7)  | 168.3(3) |
| N(8)-Mn(12)-O(50)  | 102.7(4) | O(38)-Mn(11)-O(66) | 91.1(3)  |
| O(64)-Mn(12)-O(50) | 170.9(3) | O(39)-Mn(11)-O(66) | 93.0(3)  |
| Mn(1)-O(1)-Mn(4)   | 167.6(3) | O(16)-Mn(11)-O(66) | 96.3(3)  |
| Mn(1)-O(1)-Mn(2)   | 90.1(3)  | N(7)-Mn(11)-O(66)  | 88.8(3)  |
| Mn(4)-O(1)-Mn(2)   | 89.3(2)  | O(42)-Mn(12)-O(41) | 175.7(4) |
| Mn(1)-O(1)-Mn(3)   | 89.3(2)  | O(42)-Mn(12)-O(17) | 85.6(3)  |
| Mn(4)-O(1)-Mn(3)   | 90.1(3)  | O(41)-Mn(12)-O(17) | 98.4(3)  |
| Mn(2)-O(1)-Mn(3)   | 174.4(3) | O(42)-Mn(12)-N(8)  | 84.7(4)  |

---

|                    |           |                    |            |
|--------------------|-----------|--------------------|------------|
| Mn(1)-O(1)-Y(2)    | 96.5(2)   | O(41)-Mn(12)-N(8)  | 91.2(3)    |
| Mn(4)-O(1)-Y(2)    | 95.8(2)   | O(17)-Mn(12)-N(8)  | 170.0(4)   |
| Mn(2)-O(1)-Y(2)    | 92.89(18) | Y(2)-O(5)-Y(1)     | 101.4(2)   |
| Mn(3)-O(1)-Y(2)    | 92.7(2)   | Mn(2)-O(6)-Mn(4)   | 91.9(2)    |
| Mn(2)-O(2)-Mn(5)   | 108.0(3)  | Mn(2)-O(6)-Y(4)    | 100.3(3)   |
| Mn(2)-O(2)-Y(2)    | 118.0(2)  | Mn(4)-O(6)-Y(4)    | 111.4(2)   |
| Mn(5)-O(2)-Y(2)    | 130.9(3)  | Mn(4)-O(7)-Y(2)    | 111.3(3)   |
| Mn(2)-O(2)-Y(1)    | 97.9(3)   | Mn(4)-O(7)-Y(3)    | 106.8(2)   |
| Mn(5)-O(2)-Y(1)    | 96.8(2)   | Y(2)-O(7)-Y(3)     | 101.3(2)   |
| Y(2)-O(2)-Y(1)     | 93.30(18) | Mn(3)-O(8)-Mn(4)   | 93.4(3)    |
| Mn(6)-O(3)-Mn(3)   | 109.2(3)  | Mn(3)-O(8)-Y(3)    | 109.7(3)   |
| Mn(6)-O(3)-Y(2)    | 130.2(3)  | Mn(4)-O(8)-Y(3)    | 101.0(2)   |
| Mn(3)-O(3)-Y(2)    | 117.1(3)  | Mn(3)-O(9)-Mn(1)   | 92.8(2)    |
| Mn(6)-O(3)-Y(3)    | 97.7(3)   | Mn(3)-O(9)-Y(6)    | 99.7(3)    |
| Mn(3)-O(3)-Y(3)    | 97.8(3)   | Mn(1)-O(9)-Y(6)    | 112.4(3)   |
| Y(2)-O(3)-Y(3)     | 93.3(2)   | Mn(7)-O(10)-Y(1)   | 101.9(3)   |
| Mn(2)-O(4)-Mn(1)   | 92.7(3)   | Mn(7)-O(10)-Y(2)   | 120.9(3)   |
| Mn(2)-O(4)-Y(1)    | 109.1(3)  | Y(1)-O(10)-Y(2)    | 99.03(19)  |
| Mn(1)-O(4)-Y(1)    | 101.8(2)  | Mn(8)-O(11)-Y(3)   | 100.2(3)   |
| Mn(1)-O(5)-Y(2)    | 112.0(3)  | Mn(8)-O(11)-Y(2)   | 120.7(3)   |
| Mn(1)-O(5)-Y(1)    | 107.2(3)  | Y(3)-O(11)-Y(2)    | 99.6(2)    |
| Y(5)-O(17)-Y(6)    | 102.4(2)  | Mn(1)-O(12)-Mn(10) | 102.4(3)   |
| Mn(1)-O(18)-Mn(10) | 90.5(3)   | Mn(1)-O(12)-Y(5)   | 122.8(3)   |
| Mn(4)-O(19)-Mn(9)  | 89.3(3)   | Mn(10)-O(12)-Y(5)  | 132.7(3)   |
| Mn(5)-O(21)-Y(1)   | 110.4(3)  | Mn(2)-O(13)-Y(4)   | 101.5(3)   |
| Mn(6)-O(24)-Y(3)   | 111.7(3)  | Mn(2)-O(13)-Y(5)   | 121.0(3)   |
| Mn(7)-O(27)-Y(1)   | 101.1(3)  | Y(4)-O(13)-Y(5)    | 101.9(2)   |
| Mn(8)-O(30)-Y(3)   | 99.7(3)   | Mn(4)-O(14)-Mn(9)  | 102.6(4)   |
| Mn(9)-O(33)-Y(4)   | 116.2(3)  | Mn(4)-O(14)-Y(5)   | 123.2(3)   |
| Mn(10)-O(36)-Y(6)  | 117.3(3)  | Mn(9)-O(14)-Y(5)   | 132.0(3)   |
| Mn(11)-O(39)-Y(4)  | 101.7(3)  | Mn(3)-O(15)-Y(6)   | 100.0(3)   |
| Mn(12)-O(42)-Y(6)  | 102.7(4)  | Mn(3)-O(15)-Y(5)   | 122.3(3)   |
| Y(5)-O(50)-Mn(12)  | 99.8(3)   | Y(6)-O(15)-Y(5)    | 101.2(3)   |
| Mn(2)-O(54)-Mn(5)  | 85.8(2)   | Mn(11)-O(16)-Y(4)  | 101.8(2)   |
| Mn(3)-O(56)-Mn(6)  | 85.8(2)   | Mn(11)-O(16)-Y(5)  | 118.2(3)   |
| Y(2)-O(58)-Mn(7)   | 99.1(2)   | Y(4)-O(16)-Y(5)    | 101.83(19) |
| Y(2)-O(62)-Mn(8)   | 99.4(2)   | Mn(12)-O(17)-Y(5)  | 117.8(3)   |
| Mn(12)-O(17)-Y(6)  | 101.0(3)  |                    |            |

---

## Ab Initio calculations of the local magnetic properties on Dy sites in 1-Dy and 2-Dy.

### Computational details

All ab initio calculations were done with MOLCAS 7.4. program package. All basis sets were taken from the ANO-RCC basis set library available in MOLCAS. The following contractions were used for all calculations:

Dy – 8s7p5d4f2g1h

La – La.ECP.deGraaf.0s.0s.0e-La(LaMnO3).

Zn – Zn.ECP.Lopez-Moraza.0s.0s.0e-AIMP-KZnF3.

N, O – 4s3p2d. (only for the first coordinated atoms, which make a bond with Dy)

C – 4s3p2d. (only for the atoms which are directly bonded to the first coordination sphere of O and N)

N,O, C – 3s2p. (for distant atoms)

H – 2s. (for distant atoms)

**Active space** of the CASSCF method included 9 electrons in 7 orbitals.

The **spin orbit interaction** was computed by mixing of 21 sextets, 128 quartets and 32 doublet spin free states.

The structure of the calculated Dy<sup>3+</sup> fragments is listed below.

Centers coming from the same triade are marked with the same colour (green or yellow).

In all model fragments, neighboring metal ions were modeled by diamagnetic ab initio model potentials available in MOLCAS. Dy ions were modeled by La-AIMP, while the neighboring Mn- by Zn- AIMP.

### Complex 1-Dy

#### Structure of the calculated Dy fragments

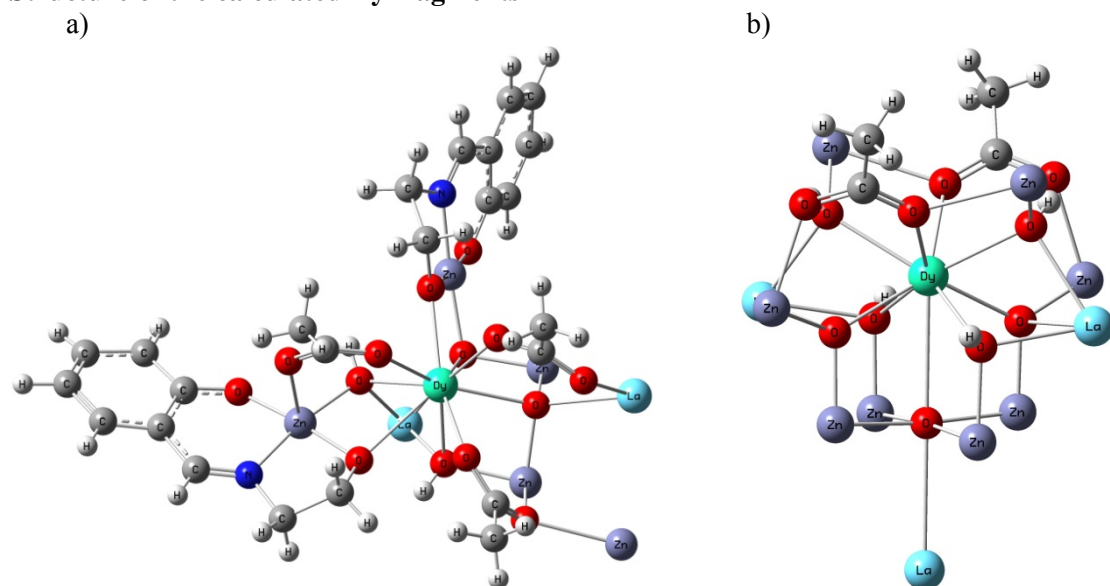

**Figure S10.** Structure of the calculated marginal Dy1 (left) and central Dy2 (right) fragments of the first triade (Dy1, Dy2 and Dy6). The structure of the marginal Dy6 fragment is similar to the Dy1. The fragments of the second triade (marginal Dy3 and Dy5 and central Dy4) have similar structures. Even if these Dy fragments have structural similarities, every Dy center was calculated ab initio.

**Table S2.** Energies of the lowest spin free states of the Dy<sup>3+</sup> sites.(cm<sup>-1</sup>)

| Spin Multiplicity | Dy1 | Dy2 | Dy3 | Dy4 | Dy5 | Dy6 |
|-------------------|-----|-----|-----|-----|-----|-----|
|                   |     |     |     |     |     |     |

|           |           |           |           |           |           |           |
|-----------|-----------|-----------|-----------|-----------|-----------|-----------|
| 6         | 0.000     | 0.000     | 0.000     | 0.000     | 0.000     | 0.000     |
|           | 35.884    | 5.930     | 35.885    | 5.918     | 35.746    | 53.032    |
|           | 224.614   | 43.412    | 224.678   | 43.507    | 224.183   | 211.272   |
|           | 318.924   | 59.694    | 318.982   | 59.771    | 318.375   | 306.008   |
|           | 326.144   | 165.800   | 326.224   | 165.803   | 325.350   | 338.769   |
|           | 357.923   | 235.792   | 357.930   | 235.812   | 357.612   | 391.629   |
|           | 403.692   | 291.579   | 403.758   | 291.591   | 402.926   | 400.835   |
|           | 482.170   | 300.813   | 482.166   | 300.803   | 482.049   | 469.249   |
|           | 501.782   | 351.924   | 501.762   | 351.906   | 501.857   | 486.087   |
|           | 771.998   | 536.037   | 771.951   | 536.231   | 772.343   | 713.680   |
|           | 792.701   | 538.440   | 792.656   | 538.628   | 793.019   | 739.710   |
|           | 7691.438  | 7531.119  | 7691.495  | 7531.165  | 7690.928  | 7692.176  |
|           | 7727.893  | 7617.303  | 7727.887  | 7617.342  | 7727.826  | 7719.464  |
|           | 7800.580  | 7663.306  | 7800.578  | 7663.327  | 7800.464  | 7781.558  |
|           | 7830.712  | 7669.071  | 7830.745  | 7669.089  | 7830.384  | 7846.853  |
|           | 7922.586  | 7711.322  | 7922.582  | 7711.389  | 7922.351  | 7894.279  |
|           | 7935.911  | 7741.500  | 7935.919  | 7741.606  | 7935.622  | 7915.602  |
|           | 7984.267  | 7798.512  | 7984.271  | 7798.586  | 7984.195  | 7969.238  |
|           | 34842.346 | 34659.701 | 34842.325 | 34659.671 | 34842.182 | 34876.046 |
|           | 35084.822 | 35008.734 | 35084.966 | 35008.698 | 35083.513 | 35092.985 |
|           | 35432.631 | 35149.820 | 35432.553 | 35150.051 | 35433.159 | 35365.376 |
| 4         | 24948.724 | 24858.868 | 24948.747 | 24858.897 | 24948.860 | 24949.146 |
|           | 24955.632 | 24860.705 | 24955.653 | 24860.734 | 24955.755 | 24955.948 |
|           | 25003.055 | 24879.491 | 25003.105 | 24879.521 | 25003.004 | 24991.772 |
|           | 25006.665 | 24892.730 | 25006.739 | 24892.777 | 25006.511 | 25010.998 |
|           | 25008.771 | 24910.195 | 25008.812 | 24910.250 | 25008.659 | 25021.674 |
|           | 25025.330 | 24924.283 | 25025.351 | 24924.317 | 25025.505 | 25031.126 |
|           | 25047.037 | 24937.235 | 25047.060 | 24937.286 | 25047.342 | 25053.349 |
|           | 25083.465 | 24945.471 | 25083.490 | 24945.505 | 25083.707 | 25085.409 |
|           | 25100.462 | 24975.585 | 25100.468 | 24975.631 | 25101.028 | 25100.600 |
|           | 25146.022 | 24999.566 | 25146.051 | 24999.593 | 25146.180 | 25125.647 |
|           | 25158.855 | 25000.778 | 25158.868 | 25000.854 | 25159.198 | 25139.857 |
|           | 25189.799 | 25023.208 | 25189.819 | 25023.298 | 25190.061 | 25167.706 |
|           | 25234.659 | 25024.521 | 25234.687 | 25024.600 | 25234.649 | 25212.067 |
|           | 25250.554 | 25156.877 | 25250.583 | 25156.925 | 25250.707 | 25260.251 |
|           | 25299.778 | 25180.766 | 25299.818 | 25180.813 | 25299.901 | 25301.764 |
|           | 25341.898 | 25191.458 | 25341.920 | 25191.514 | 25342.008 | 25335.465 |
|           | 25364.286 | 25224.361 | 25364.309 | 25224.434 | 25364.504 | 25354.816 |
|           | 25374.207 | 25238.717 | 25374.209 | 25238.759 | 25374.823 | 25366.566 |
|           | 25397.832 | 25249.570 | 25397.849 | 25249.609 | 25397.860 | 25392.442 |
|           | 25404.271 | 25257.912 | 25404.274 | 25257.974 | 25404.691 | 25400.047 |
|           | 25415.029 | 25263.512 | 25415.060 | 25263.573 | 25415.273 | 25419.112 |
|           | 25444.545 | 25290.376 | 25444.582 | 25290.426 | 25444.671 | 25448.368 |
|           | 25462.528 | 25294.153 | 25462.554 | 25294.196 | 25462.790 | 25459.018 |
|           | 25480.589 | 25331.725 | 25480.607 | 25331.796 | 25480.461 | 25472.551 |
|           | 25500.631 | 25359.714 | 25500.658 | 25359.748 | 25500.513 | 25489.044 |
|           | 25510.134 | 25366.818 | 25510.148 | 25366.847 | 25510.155 | 25505.888 |
|           | 25543.665 | 25376.266 | 25543.674 | 25376.307 | 25543.573 | 25527.432 |
| 25566.904 | 25377.774 | 25566.917 | 25377.814 | 25566.879 | 25550.275 |           |
| 25604.367 | 25410.882 | 25604.399 | 25410.929 | 25604.467 | 25585.528 |           |
| ...       | ...       | ...       | ...       | ...       | ...       |           |
| 2         | 37380.803 | 37267.403 | 37380.837 | 37267.448 | 37380.178 | 37370.888 |
|           | 37386.249 | 37271.163 | 37386.288 | 37271.210 | 37385.681 | 37377.969 |
|           | 37407.892 | 37292.239 | 37407.926 | 37292.279 | 37407.334 | 37402.345 |
|           | 37410.176 | 37293.894 | 37410.218 | 37293.937 | 37409.679 | 37406.780 |
|           | 37436.459 | 37307.695 | 37436.465 | 37307.737 | 37435.912 | 37429.875 |
|           | 37473.990 | 37317.251 | 37473.999 | 37317.294 | 37473.427 | 37463.967 |
|           | 37545.730 | 37348.308 | 37545.746 | 37348.342 | 37545.097 | 37552.384 |
|           | 37560.951 | 37375.163 | 37560.969 | 37375.207 | 37560.301 | 37558.150 |
|           | 37586.157 | 37410.779 | 37586.165 | 37410.833 | 37585.798 | 37581.053 |
|           | 37602.890 | 37446.163 | 37602.907 | 37446.240 | 37602.449 | 37594.842 |
|           | 37616.381 | 37462.265 | 37616.404 | 37462.332 | 37615.633 | 37601.647 |



|           |           |           |           |           |           |
|-----------|-----------|-----------|-----------|-----------|-----------|
| 37623.350 | 37477.723 | 37623.364 | 37477.778 | 37622.853 | 37609.632 |
| 37699.879 | 37487.864 | 37699.893 | 37487.904 | 37699.319 | 37691.276 |
| 37736.780 | 37515.689 | 37736.794 | 37515.729 | 37736.221 | 37730.567 |
| 37741.146 | 37531.464 | 37741.167 | 37531.509 | 37740.520 | 37733.139 |
| 37761.633 | 37536.315 | 37761.652 | 37536.363 | 37760.953 | 37755.295 |
| 37764.001 | 37539.693 | 37764.022 | 37539.732 | 37763.305 | 37758.843 |
| 39084.153 | 38967.708 | 39084.177 | 38967.748 | 39083.683 | 39069.772 |
| 39099.665 | 38973.468 | 39099.691 | 38973.506 | 39099.081 | 39084.001 |
| 39119.091 | 38977.758 | 39119.147 | 38977.800 | 39118.575 | 39123.809 |
| 39136.311 | 38983.609 | 39136.335 | 38983.639 | 39135.869 | 39126.941 |
| 39154.116 | 39033.776 | 39154.132 | 39033.822 | 39153.560 | 39152.154 |
| 39174.756 | 39036.269 | 39174.762 | 39036.316 | 39174.253 | 39166.765 |
| 39235.700 | 39037.871 | 39235.713 | 39037.894 | 39235.363 | 39244.836 |
| 39240.228 | 39064.607 | 39240.247 | 39064.646 | 39239.766 | 39250.809 |
| 39285.806 | 39099.930 | 39285.817 | 39099.960 | 39285.354 | 39282.249 |
| 39329.913 | 39128.696 | 39329.920 | 39128.789 | 39329.525 | 39316.142 |
| 39339.708 | 39130.147 | 39339.719 | 39130.241 | 39339.150 | 39324.542 |
| 39348.641 | 39138.881 | 39348.659 | 39138.932 | 39347.948 | 39330.193 |
| 39364.258 | 39140.461 | 39364.278 | 39140.514 | 39363.615 | 39348.306 |
| 39385.149 | 39157.292 | 39385.167 | 39157.328 | 39384.437 | 39376.023 |
| 39392.031 | 39163.045 | 39392.051 | 39163.080 | 39391.288 | 39380.299 |
| ...       | ...       | ...       | ...       | ...       | ...       |

**Table S3.** Energies of the lowest spin-orbit Kramers doublets states of the Dy<sup>3+</sup> sites.(cm<sup>-1</sup>)

|  | Dy1       | Dy2       | Dy3       | Dy4       | Dy5       | Dy6       |
|--|-----------|-----------|-----------|-----------|-----------|-----------|
|  | 0.000     | 0.000     | 0.000     | 0.000     | 0.000     | 0.000     |
|  | 135.009   | 90.303    | 135.042   | 90.347    | 134.755   | 121.455   |
|  | 195.996   | 115.056   | 196.075   | 115.117   | 195.501   | 184.144   |
|  | 252.697   | 158.733   | 252.762   | 158.791   | 252.293   | 245.622   |
|  | 292.383   | 197.267   | 292.425   | 197.328   | 292.203   | 284.242   |
|  | 344.744   | 266.794   | 344.780   | 266.837   | 344.631   | 319.869   |
|  | 392.816   | 296.076   | 392.780   | 296.096   | 393.242   | 356.414   |
|  | 647.649   | 482.617   | 647.614   | 482.823   | 647.971   | 570.612   |
|  | 3644.461  | 3574.865  | 3644.470  | 3574.885  | 3644.278  | 3623.059  |
|  | 3675.042  | 3604.027  | 3675.057  | 3604.056  | 3674.934  | 3691.064  |
|  | 3739.035  | 3681.053  | 3739.119  | 3681.084  | 3738.474  | 3739.394  |
|  | 3780.821  | 3733.487  | 3780.872  | 3733.544  | 3780.557  | 3771.966  |
|  | 3853.469  | 3789.629  | 3853.496  | 3789.649  | 3853.364  | 3824.203  |
|  | 3939.237  | 3816.364  | 3939.252  | 3816.460  | 3939.278  | 3896.581  |
|  | 4030.611  | 3877.368  | 4030.572  | 3877.549  | 4030.994  | 3962.911  |
|  | 6175.674  | 6101.547  | 6175.687  | 6101.571  | 6175.607  | 6172.618  |
|  | 6207.793  | 6142.782  | 6207.829  | 6142.813  | 6207.503  | 6207.609  |
|  | 6276.568  | 6223.975  | 6276.638  | 6224.021  | 6276.037  | 6265.842  |
|  | 6337.018  | 6284.889  | 6337.040  | 6284.912  | 6336.953  | 6315.078  |
|  | 6448.131  | 6339.602  | 6448.172  | 6339.748  | 6447.978  | 6396.207  |
|  | 6489.726  | 6339.982  | 6489.682  | 6340.082  | 6490.180  | 6448.477  |
|  | 8136.913  | 8062.283  | 8136.938  | 8062.315  | 8136.798  | 8130.770  |
|  | 8171.178  | 8104.189  | 8171.210  | 8104.231  | 8170.936  | 8162.202  |
|  | 8233.869  | 8208.198  | 8233.921  | 8208.229  | 8233.567  | 8220.966  |
|  | 8386.743  | 8275.642  | 8386.782  | 8275.776  | 8386.556  | 8336.372  |
|  | 8416.177  | 8282.823  | 8416.145  | 8282.895  | 8416.568  | 8387.097  |
|  | 9639.100  | 9570.835  | 9639.130  | 9570.874  | 9638.962  | 9627.544  |
|  | 9728.022  | 9684.141  | 9728.060  | 9684.168  | 9727.757  | 9724.683  |
|  | 9836.173  | 9782.291  | 9836.218  | 9782.348  | 9835.969  | 9814.562  |
|  | 9946.454  | 9809.282  | 9946.434  | 9809.415  | 9946.774  | 9896.224  |
|  | 10098.143 | 10015.817 | 10098.188 | 10015.861 | 10097.880 | 10072.670 |
|  | 10106.608 | 10019.823 | 10106.618 | 10019.879 | 10106.541 | 10099.858 |
|  | 10142.631 | 10065.327 | 10142.669 | 10065.397 | 10142.393 | 10125.533 |
|  | 10193.294 | 10067.377 | 10193.311 | 10067.412 | 10193.122 | 10165.001 |
|  | 10238.833 | 10102.952 | 10238.839 | 10103.035 | 10238.848 | 10210.022 |
|  | 10275.431 | 10168.101 | 10275.441 | 10168.195 | 10275.362 | 10242.849 |

|           |           |           |           |           |           |
|-----------|-----------|-----------|-----------|-----------|-----------|
| 10819.000 | 10747.418 | 10819.021 | 10747.441 | 10818.879 | 10815.170 |
| 10925.511 | 10876.680 | 10925.578 | 10876.711 | 10925.164 | 10918.122 |
| 11148.346 | 11025.296 | 11148.323 | 11025.449 | 11148.686 | 11091.438 |
| 11533.783 | 11439.736 | 11533.813 | 11439.777 | 11533.612 | 11517.631 |
| 11591.558 | 11475.231 | 11591.580 | 11475.308 | 11591.456 | 11566.563 |
| 11610.221 | 11491.721 | 11610.230 | 11491.791 | 11610.212 | 11581.475 |
| 11618.699 | 11523.487 | 11618.714 | 11523.553 | 11618.725 | 11594.454 |
| 11641.066 | 11535.169 | 11641.089 | 11535.241 | 11640.982 | 11615.364 |
| 13469.107 | 13381.352 | 13469.132 | 13381.414 | 13469.040 | 13446.279 |
| 13517.106 | 13412.907 | 13517.128 | 13412.967 | 13516.980 | 13494.492 |
| 13546.427 | 13448.947 | 13546.444 | 13449.017 | 13546.343 | 13522.052 |
| 13572.739 | 13464.177 | 13572.760 | 13464.250 | 13572.694 | 13549.307 |
| 14937.601 | 14852.996 | 14937.625 | 14853.058 | 14937.509 | 14913.119 |
| 14982.379 | 14866.672 | 14982.399 | 14866.741 | 14982.280 | 14960.486 |
| 14996.233 | 14901.716 | 14996.251 | 14901.785 | 14996.167 | 14972.899 |
| 15826.843 | 15733.880 | 15826.869 | 15733.944 | 15826.719 | 15806.509 |
| 15846.647 | 15740.557 | 15846.663 | 15740.629 | 15846.603 | 15820.572 |
| 16369.335 | 16268.637 | 16369.354 | 16268.707 | 16369.273 | 16344.354 |
| 24583.267 | 24508.212 | 24583.301 | 24508.270 | 24583.421 | 24565.820 |
| 24621.363 | 24603.819 | 24621.390 | 24603.877 | 24621.497 | 24600.164 |
| 24724.008 | 24630.967 | 24724.046 | 24631.021 | 24724.059 | 24706.252 |
| 24771.094 | 24657.009 | 24771.127 | 24657.062 | 24771.175 | 24748.102 |
| 24883.296 | 24778.611 | 24883.318 | 24778.686 | 24883.450 | 24861.806 |
| 25188.338 | 25126.357 | 25188.363 | 25126.407 | 25188.131 | 25145.665 |
| 25226.675 | 25134.046 | 25226.757 | 25134.092 | 25226.341 | 25233.160 |
| 25245.032 | 25197.559 | 25245.061 | 25197.603 | 25244.933 | 25246.874 |
| 25274.309 | 25221.160 | 25274.325 | 25221.193 | 25274.430 | 25286.150 |
| 25355.608 | 25245.909 | 25355.622 | 25245.977 | 25355.794 | 25336.502 |
| 25436.194 | 25314.561 | 25436.232 | 25314.690 | 25436.051 | 25409.049 |
| 25470.697 | 25327.452 | 25470.727 | 25327.499 | 25470.673 | 25426.120 |
| 25516.943 | 25354.348 | 25516.927 | 25354.440 | 25517.254 | 25471.521 |
| 27281.193 | 27208.729 | 27281.218 | 27208.755 | 27281.322 | 27283.019 |
| 27346.481 | 27277.221 | 27346.527 | 27277.275 | 27346.523 | 27335.638 |
| 27377.729 | 27304.595 | 27377.777 | 27304.660 | 27377.788 | 27361.578 |
| 27410.859 | 27337.381 | 27410.895 | 27337.448 | 27411.001 | 27388.492 |
| 27453.030 | 27356.223 | 27453.063 | 27356.289 | 27453.196 | 27424.300 |
| 27523.243 | 27396.306 | 27523.241 | 27396.434 | 27523.749 | 27480.987 |
| 27550.381 | 27515.802 | 27550.371 | 27515.850 | 27550.936 | 27518.085 |
| 27580.880 | 27517.959 | 27580.935 | 27518.015 | 27581.090 | 27588.314 |
| ...       | ...       | ...       | ...       | ...       | ...       |

**Table S4.** Main values of the g tensor of the lowest Kramers doublet on Dy<sup>3+</sup> sites in complex 1-Dy.

|    | Dy1     | Dy2     | Dy3     | Dy4     | Dy5     | Dy6     |
|----|---------|---------|---------|---------|---------|---------|
| gx | 0.1388  | 0.0717  | 0.1387  | 0.0716  | 0.1388  | 0.1295  |
| gy | 0.2174  | 0.0861  | 0.2197  | 0.0849  | 0.2184  | 0.2264  |
| gz | 18.8602 | 19.8561 | 18.8950 | 19.4853 | 18.7957 | 19.1599 |

**Table S5.** Relative angles between main anisotropy axes on Dy sites in complex 1-Dy.

|     | Dy1   | Dy2   | Dy3   | Dy4   | Dy5   | Dy6   |
|-----|-------|-------|-------|-------|-------|-------|
| Dy1 | 0.00  | 11.35 | 71.23 | 80.00 | 70.16 | 12.08 |
| Dy2 | 11.35 | 0.00  | 79.47 | 89.13 | 80.00 | 20.58 |
| Dy3 | 71.23 | 79.47 | 0.00  | 11.55 | 13.06 | 59.44 |
| Dy4 | 80.00 | 89.13 | 11.55 | 0.00  | 11.43 | 68.68 |
| Dy5 | 70.16 | 80.00 | 13.06 | 11.43 | 0.00  | 59.41 |
| Dy6 | 12.08 | 20.58 | 59.44 | 68.68 | 59.41 | 0.00  |

## Complex 2-Dy

### Structure of the calculated Dy fragments

a)

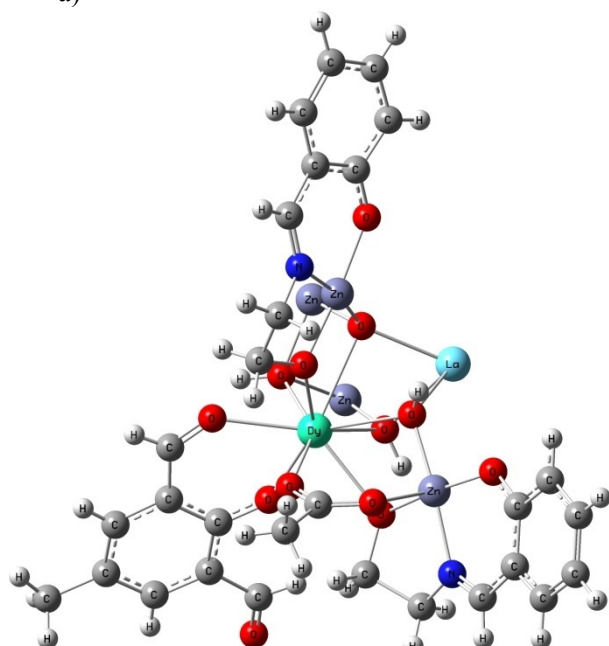

b)

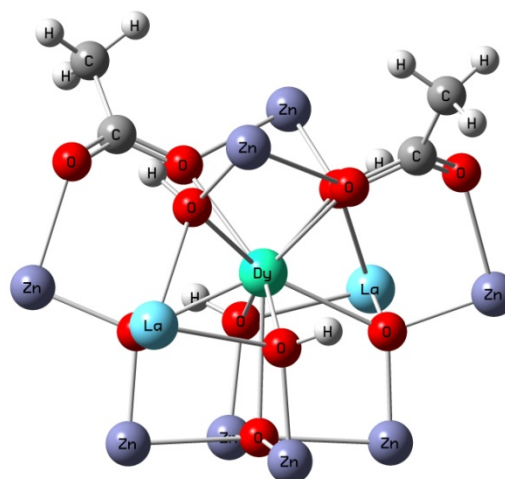

**Figure S11.** Structure of the calculated marginal Dy1 (left) and central Dy2 (right) fragments of the first triade (Dy1, Dy2 and Dy3). The structure of the marginal Dy3 fragment is similar to the Dy1. The fragments of the second triade (marginal Dy4 and Dy5 and central Dy6) have similar structures. Even if these Dy fragments have structural similarities, every Dy center was calculated ab initio.

**Table S6.** Energies of the lowest spin free states of the Dy<sup>3+</sup> sites.(cm<sup>-1</sup>)

| Spin Multiplicity | Dy1       | Dy2       | Dy3       | Dy4       | Dy5       | Dy6       |
|-------------------|-----------|-----------|-----------|-----------|-----------|-----------|
| 6                 | 0.000     | 0.000     | 0.000     | 0.000     | 0.000     | 0.000     |
|                   | 21.408    | 40.874    | 22.633    | 40.078    | 6.875     | 35.982    |
|                   | 276.686   | 75.608    | 221.556   | 192.234   | 58.026    | 193.927   |
|                   | 317.180   | 103.226   | 262.915   | 307.254   | 121.861   | 295.076   |
|                   | 466.380   | 121.138   | 374.776   | 356.132   | 158.232   | 354.888   |
|                   | 578.062   | 244.044   | 479.844   | 384.700   | 276.979   | 397.698   |
|                   | 600.229   | 259.854   | 511.292   | 458.088   | 382.205   | 482.244   |
|                   | 811.115   | 325.476   | 644.289   | 529.342   | 463.084   | 520.246   |
|                   | 819.267   | 364.265   | 653.876   | 544.981   | 514.573   | 545.984   |
|                   | 877.518   | 656.025   | 776.011   | 847.963   | 696.714   | 844.705   |
|                   | 880.098   | 657.297   | 778.248   | 859.129   | 705.593   | 856.314   |
|                   | 7803.720  | 7567.903  | 7741.497  | 7707.201  | 7594.331  | 7709.564  |
|                   | 7834.863  | 7663.500  | 7762.858  | 7740.824  | 7673.236  | 7741.197  |
|                   | 7943.929  | 7667.444  | 7837.737  | 7813.012  | 7732.219  | 7814.339  |
|                   | 7998.238  | 7681.219  | 7910.094  | 7882.715  | 7744.946  | 7878.462  |
|                   | 8036.920  | 7770.268  | 7942.801  | 7958.166  | 7771.791  | 7964.028  |
|                   | 8083.822  | 7792.070  | 7984.751  | 7979.560  | 7894.960  | 7977.366  |
|                   | 8123.199  | 7850.615  | 8030.494  | 8018.049  | 7921.703  | 8022.604  |
|                   | 34728.033 | 34702.261 | 34765.222 | 34785.322 | 34590.009 | 34766.067 |
|                   | 35238.218 | 34969.635 | 35125.180 | 35122.564 | 35229.878 | 35157.919 |
| 35781.114         | 35324.517 | 35605.364 | 35545.645 | 35289.175 | 35541.900 |           |
| 4                 | 24986.733 | 24899.622 | 24951.001 | 24948.512 | 24897.085 | 24945.750 |
|                   | 24987.750 | 24902.196 | 24953.121 | 24953.318 | 24904.125 | 24950.861 |
|                   | 25122.278 | 24921.616 | 25050.708 | 25023.982 | 24908.884 | 25028.281 |
|                   | 25135.896 | 24930.129 | 25070.397 | 25036.556 | 24923.080 | 25037.678 |
|                   | 25182.830 | 24950.134 | 25099.259 | 25074.680 | 24977.620 | 25078.939 |
|                   | 25228.089 | 24960.831 | 25152.090 | 25091.108 | 24990.069 | 25105.185 |
|                   | 25251.480 | 24982.019 | 25169.044 | 25095.499 | 25020.495 | 25105.769 |

|   |           |           |           |           |           |           |
|---|-----------|-----------|-----------|-----------|-----------|-----------|
|   | 25270.794 | 24992.529 | 25194.642 | 25139.255 | 25023.816 | 25139.997 |
|   | 25273.464 | 25002.813 | 25200.269 | 25151.840 | 25091.566 | 25148.912 |
|   | 25324.103 | 25019.512 | 25231.066 | 25178.592 | 25097.005 | 25190.343 |
|   | 25335.390 | 25028.710 | 25236.568 | 25189.900 | 25130.898 | 25196.179 |
|   | 25354.512 | 25095.785 | 25253.435 | 25222.197 | 25164.548 | 25233.062 |
|   | 25355.024 | 25104.863 | 25260.319 | 25240.439 | 25184.396 | 25253.013 |
|   | 25406.567 | 25217.080 | 25322.918 | 25296.343 | 25258.392 | 25299.874 |
|   | 25430.237 | 25246.542 | 25354.664 | 25349.118 | 25271.469 | 25353.373 |
|   | 25456.284 | 25255.980 | 25375.301 | 25364.311 | 25304.962 | 25362.389 |
|   | 25477.189 | 25267.974 | 25394.675 | 25380.149 | 25316.646 | 25383.006 |
|   | 25482.209 | 25296.253 | 25405.412 | 25396.144 | 25321.662 | 25400.129 |
|   | 25506.031 | 25298.788 | 25429.790 | 25407.441 | 25328.429 | 25406.226 |
|   | 25531.065 | 25313.466 | 25473.804 | 25435.565 | 25341.698 | 25438.789 |
|   | 25539.965 | 25318.132 | 25476.004 | 25462.341 | 25355.999 | 25465.015 |
|   | 25559.316 | 25324.075 | 25486.455 | 25483.504 | 25359.433 | 25482.717 |
|   | 25588.651 | 25338.380 | 25510.274 | 25488.558 | 25367.996 | 25490.000 |
|   | 25591.407 | 25368.453 | 25515.732 | 25519.795 | 25416.131 | 25517.034 |
|   | 25632.866 | 25374.459 | 25559.458 | 25534.826 | 25418.312 | 25528.746 |
|   | 25638.011 | 25399.934 | 25569.569 | 25546.935 | 25431.225 | 25545.424 |
|   | 25670.413 | 25419.687 | 25600.316 | 25569.235 | 25437.934 | 25559.753 |
|   | 25675.811 | 25421.508 | 25604.944 | 25580.066 | 25443.522 | 25579.086 |
|   | 25705.964 | 25428.167 | 25630.391 | 25594.885 | 25482.268 | 25596.152 |
|   | ...       | ...       | ...       | ...       | ...       | ...       |
| 2 | 37527.625 | 37311.859 | 37453.125 | 37411.457 | 37354.698 | 37416.840 |
|   | 37542.228 | 37316.894 | 37472.657 | 37425.537 | 37357.282 | 37427.270 |
|   | 37566.041 | 37328.162 | 37484.959 | 37430.808 | 37361.057 | 37446.478 |
|   | 37593.621 | 37334.111 | 37501.729 | 37442.925 | 37361.669 | 37457.481 |
|   | 37602.971 | 37371.297 | 37506.192 | 37477.071 | 37416.872 | 37487.634 |
|   | 37626.063 | 37383.407 | 37542.765 | 37518.386 | 37430.250 | 37527.116 |
|   | 37650.874 | 37422.640 | 37568.837 | 37568.630 | 37436.239 | 37574.023 |
|   | 37692.677 | 37427.460 | 37617.119 | 37586.293 | 37445.951 | 37582.666 |
|   | 37704.306 | 37480.460 | 37627.389 | 37600.974 | 37506.481 | 37599.963 |
|   | 37731.643 | 37496.139 | 37651.858 | 37619.115 | 37559.248 | 37626.834 |
|   | 37750.897 | 37531.621 | 37667.507 | 37673.174 | 37584.298 | 37683.334 |
|   | 37765.514 | 37533.362 | 37685.898 | 37677.049 | 37591.748 | 37686.710 |
|   | 37774.902 | 37541.763 | 37697.622 | 37721.898 | 37600.143 | 37721.848 |
|   | 37829.974 | 37578.380 | 37751.221 | 37760.764 | 37604.023 | 37757.401 |
|   | 37840.296 | 37599.830 | 37760.544 | 37765.407 | 37605.996 | 37762.314 |
|   | 37867.014 | 37602.333 | 37787.960 | 37781.406 | 37611.745 | 37784.368 |
|   | 37872.054 | 37603.668 | 37792.375 | 37792.891 | 37629.066 | 37794.223 |
|   | 39176.519 | 39019.278 | 39115.527 | 39093.697 | 39026.087 | 39096.503 |
|   | 39185.726 | 39023.285 | 39128.479 | 39104.554 | 39034.015 | 39106.247 |
|   | 39259.508 | 39025.319 | 39179.433 | 39159.361 | 39038.735 | 39173.383 |
|   | 39300.604 | 39033.910 | 39219.895 | 39164.199 | 39047.391 | 39175.704 |
|   | 39310.061 | 39090.147 | 39227.865 | 39200.875 | 39110.868 | 39206.834 |
|   | 39346.049 | 39092.426 | 39244.652 | 39227.176 | 39117.040 | 39231.432 |
|   | 39351.793 | 39098.831 | 39254.945 | 39259.418 | 39137.313 | 39257.158 |
|   | 39383.552 | 39110.128 | 39303.228 | 39271.547 | 39158.139 | 39276.902 |
|   | 39386.532 | 39158.847 | 39306.630 | 39308.869 | 39206.723 | 39305.627 |
|   | 39437.165 | 39190.450 | 39358.628 | 39348.342 | 39213.660 | 39348.068 |
|   | 39442.178 | 39195.294 | 39363.499 | 39365.454 | 39216.990 | 39365.032 |
|   | 39476.719 | 39211.640 | 39393.058 | 39395.734 | 39254.727 | 39400.505 |
|   | 39478.281 | 39215.804 | 39394.166 | 39398.473 | 39264.961 | 39403.416 |
|   | 39495.877 | 39234.073 | 39413.670 | 39405.998 | 39292.339 | 39411.565 |
|   | 39496.841 | 39235.149 | 39414.138 | 39411.561 | 39293.351 | 39416.251 |
|   | ...       | ...       | ...       | ...       | ...       | ...       |

**Table S7.** Energies of the lowest spin-orbit Kramers doublets states of the Dy<sup>3+</sup> sites. (cm<sup>-1</sup>)

|  | Dy1     | Dy2    | Dy3     | Dy4     | Dy5    | Dy6     |
|--|---------|--------|---------|---------|--------|---------|
|  | 0.000   | 0.000  | 0.000   | 0.000   | 0.000  | 0.000   |
|  | 201.018 | 57.496 | 166.564 | 175.466 | 60.539 | 171.187 |

|           |           |           |           |           |           |
|-----------|-----------|-----------|-----------|-----------|-----------|
| 341.003   | 102.427   | 269.256   | 254.437   | 130.416   | 256.839   |
| 433.884   | 153.833   | 339.928   | 298.752   | 229.432   | 315.947   |
| 519.180   | 214.356   | 415.884   | 359.991   | 319.494   | 385.530   |
| 662.761   | 247.055   | 547.323   | 400.416   | 405.506   | 425.160   |
| 751.974   | 270.591   | 583.759   | 498.355   | 479.173   | 493.242   |
| 806.521   | 588.670   | 687.668   | 754.513   | 641.985   | 759.792   |
| 3644.084  | 3561.607  | 3627.595  | 3616.133  | 3557.947  | 3614.711  |
| 3807.467  | 3608.955  | 3753.272  | 3735.064  | 3632.996  | 3737.814  |
| 3912.218  | 3659.584  | 3835.211  | 3827.852  | 3742.399  | 3835.192  |
| 4001.207  | 3706.336  | 3913.517  | 3862.549  | 3830.880  | 3885.702  |
| 4089.012  | 3749.935  | 3982.152  | 3896.985  | 3907.642  | 3911.244  |
| 4174.819  | 3860.709  | 4045.175  | 3996.498  | 3957.184  | 4003.956  |
| 4296.795  | 3965.330  | 4155.956  | 4143.850  | 4021.632  | 4148.872  |
| 6246.295  | 6082.964  | 6210.621  | 6186.669  | 6089.815  | 6186.732  |
| 6366.863  | 6151.432  | 6306.925  | 6270.962  | 6207.699  | 6278.760  |
| 6453.650  | 6208.223  | 6374.784  | 6352.354  | 6316.226  | 6367.287  |
| 6539.638  | 6237.992  | 6445.809  | 6386.585  | 6402.155  | 6400.891  |
| 6613.488  | 6374.723  | 6495.772  | 6481.490  | 6447.233  | 6490.914  |
| 6799.236  | 6415.497  | 6663.446  | 6615.546  | 6465.784  | 6620.855  |
| 8244.423  | 8044.718  | 8192.542  | 8162.330  | 8070.634  | 8166.539  |
| 8341.615  | 8116.504  | 8274.578  | 8237.131  | 8199.132  | 8247.961  |
| 8446.348  | 8166.286  | 8364.966  | 8309.527  | 8311.973  | 8324.566  |
| 8515.138  | 8305.282  | 8407.917  | 8399.378  | 8375.771  | 8408.615  |
| 8711.928  | 8338.307  | 8583.244  | 8539.189  | 8392.882  | 8544.672  |
| 9776.331  | 9557.424  | 9715.576  | 9678.415  | 9607.108  | 9687.611  |
| 9902.714  | 9674.386  | 9839.460  | 9796.964  | 9776.780  | 9807.754  |
| 10019.745 | 9777.468  | 9919.179  | 9883.155  | 9881.987  | 9895.294  |
| 10194.770 | 9872.547  | 10082.560 | 10043.031 | 9926.850  | 10051.490 |
| 10209.047 | 10019.849 | 10124.057 | 10119.250 | 10082.770 | 10126.135 |
| 10313.232 | 10033.692 | 10231.542 | 10159.224 | 10088.726 | 10169.580 |
| 10343.193 | 10046.079 | 10256.833 | 10224.858 | 10133.918 | 10229.212 |
| 10394.159 | 10088.888 | 10296.546 | 10261.741 | 10149.487 | 10267.758 |
| 10433.981 | 10131.279 | 10321.238 | 10304.932 | 10192.586 | 10312.869 |
| 10449.030 | 10198.701 | 10346.822 | 10340.104 | 10317.383 | 10351.103 |
| 10902.347 | 10740.706 | 10851.986 | 10838.963 | 10765.004 | 10842.117 |
| 11208.703 | 10846.937 | 11105.588 | 11008.552 | 10989.883 | 11029.651 |
| 11397.048 | 11100.912 | 11262.741 | 11254.589 | 11183.970 | 11261.503 |
| 11719.020 | 11439.120 | 11627.613 | 11584.694 | 11518.214 | 11592.802 |
| 11738.432 | 11490.844 | 11656.294 | 11646.273 | 11550.863 | 11653.689 |
| 11769.364 | 11514.508 | 11679.556 | 11666.051 | 11583.427 | 11671.598 |
| 11807.490 | 11540.223 | 11711.966 | 11685.055 | 11620.385 | 11693.443 |
| 11855.252 | 11552.862 | 11750.035 | 11712.965 | 11647.651 | 11722.815 |
| 13663.159 | 13394.698 | 13569.395 | 13533.439 | 13466.482 | 13543.215 |
| 13695.130 | 13431.855 | 13602.716 | 13564.938 | 13498.441 | 13571.514 |
| 13723.009 | 13462.273 | 13632.084 | 13616.490 | 13552.297 | 13626.447 |
| 13767.061 | 13480.641 | 13671.488 | 13640.033 | 13562.345 | 13649.427 |
| 15125.932 | 14868.122 | 15032.600 | 14997.799 | 14936.980 | 15007.126 |
| 15167.953 | 14884.806 | 15076.040 | 15039.876 | 14961.516 | 15048.708 |
| 15184.879 | 14917.390 | 15090.015 | 15066.765 | 15003.385 | 15076.362 |
| 16018.732 | 15745.860 | 15925.905 | 15890.344 | 15828.045 | 15900.512 |
| 16031.937 | 15762.564 | 15937.530 | 15911.567 | 15837.429 | 15920.413 |
| 16561.304 | 16288.168 | 16465.068 | 16434.653 | 16369.027 | 16444.314 |
| 24749.035 | 24529.851 | 24669.236 | 24630.274 | 24589.636 | 24640.198 |
| 24835.321 | 24622.986 | 24749.702 | 24695.904 | 24655.319 | 24706.218 |
| 24914.800 | 24647.243 | 24828.834 | 24785.444 | 24704.429 | 24793.239 |
| 24956.685 | 24668.417 | 24868.086 | 24826.429 | 24761.556 | 24835.397 |
| 25025.212 | 24811.883 | 24945.208 | 24953.323 | 24882.225 | 24960.876 |
| 25237.589 | 25146.324 | 25203.680 | 25183.879 | 25167.735 | 25186.510 |
| 25377.429 | 25156.429 | 25311.198 | 25297.481 | 25183.191 | 25306.207 |
| 25455.190 | 25202.374 | 25379.243 | 25343.477 | 25260.721 | 25365.416 |
| 25519.899 | 25222.921 | 25439.353 | 25391.175 | 25317.024 | 25397.248 |
| 25578.382 | 25266.284 | 25479.122 | 25413.282 | 25370.169 | 25418.953 |

|  |           |           |           |           |           |           |
|--|-----------|-----------|-----------|-----------|-----------|-----------|
|  | 25613.534 | 25299.609 | 25499.398 | 25477.871 | 25441.522 | 25490.238 |
|  | 25648.200 | 25406.826 | 25543.999 | 25518.202 | 25470.194 | 25527.581 |
|  | 25719.511 | 25415.332 | 25606.530 | 25606.902 | 25488.285 | 25613.134 |
|  | 27399.842 | 27216.152 | 27359.254 | 27329.837 | 27224.614 | 27328.446 |
|  | 27492.152 | 27283.645 | 27422.132 | 27390.493 | 27358.465 | 27402.180 |
|  | 27575.533 | 27329.491 | 27480.346 | 27439.289 | 27420.320 | 27457.434 |
|  | 27588.316 | 27361.331 | 27525.795 | 27487.648 | 27469.879 | 27502.904 |
|  | 27633.284 | 27393.006 | 27530.671 | 27538.332 | 27497.902 | 27548.301 |
|  | 27711.176 | 27470.670 | 27599.812 | 27583.750 | 27525.327 | 27592.187 |
|  | 27728.418 | 27537.452 | 27666.370 | 27608.052 | 27586.071 | 27621.647 |
|  | 27773.003 | 27549.990 | 27682.136 | 27643.253 | 27591.090 | 27657.636 |
|  | ...       | ...       | ...       | ...       | ...       | ...       |

**Table S8.** Main values of the *g* tensor of the lowest Kramers doublet on Dy<sup>3+</sup> sites in complex 1-Dy.

|    | Dy1     | Dy2     | Dy3     | Dy4     | Dy5     | Dy6     |
|----|---------|---------|---------|---------|---------|---------|
| gx | 0.0211  | 0.0825  | 0.0437  | 0.0498  | 0.0123  | 0.0390  |
| gy | 0.0378  | 0.1620  | 0.0886  | 0.0634  | 0.0246  | 0.0527  |
| gz | 19.7550 | 19.7567 | 19.6271 | 19.6111 | 19.5185 | 19.6850 |

**Table S9.** Relative angles between main anisotropy axes on Dy sites in complex 1-Dy.

|     | Dy1   | Dy2   | Dy3   | Dy4   | Dy5   | Dy6   |
|-----|-------|-------|-------|-------|-------|-------|
| Dy1 | 0.00  | 22.04 | 41.66 | 59.41 | 40.21 | 60.13 |
| Dy2 | 22.04 | 0.00  | 20.78 | 51.60 | 30.61 | 51.19 |
| Dy3 | 41.66 | 20.78 | 0.00  | 58.82 | 40.98 | 57.37 |
| Dy4 | 59.41 | 51.60 | 58.82 | 0.00  | 21.07 | 2.64  |
| Dy5 | 40.21 | 30.61 | 40.98 | 21.07 | 0.00  | 20.95 |
| Dy6 | 60.13 | 51.19 | 57.37 | 2.64  | 20.95 | 0.00  |

## Complex 2-Y

In order to estimate the anisotropy of the marginal Mn<sup>III</sup> ions, fragment ab initio calculations were performed on Mn model fragments.

### Computational details

All ab initio calculations were done with MOLCAS 7.4. program package. All basis sets were taken from the ANO-RCC basis set library available in MOLCAS. The following contractions were used for all calculations:

Mn – 7s6p4d3f2g1h.

Y – Y.ECP.Abdalla.0s.0s.0e-AIMP-Cs2NaYCl6.

Zn – Zn.ECP.Lopez-Moraza.0s.0s.0e-AIMP-KZnF3.

N, O – 4s3p2d. (only for the first coordinated atoms, which make a bond with Dy)

C – 4s3p2d. (only for the atoms which are directly bonded to the first coordination sphere of O and N)

N,O, C – 3s2p. (for distant atoms)

H – 2s. (for distant atoms)

**Active space** of the CASSCF method included 4 electrons in 5 orbitals.

The **spin orbit interaction** was computed by mixing of 5 quintets, 45 triplets and 75 singlet spin free states (all ligand-field states arising from d<sup>4</sup> electronic configuration).

The structure of the calculated Mn<sup>3+</sup> fragments is listed below.

In all model fragments, neighboring metal ions were modeled by diamagnetic ab initio model potentials available in MOLCAS. Y ions were modeled by Y-AIMP, while the neighboring Mn- by Zn- AIMP.

### Structure of the calculated marginal Mn<sup>3+</sup> fragments

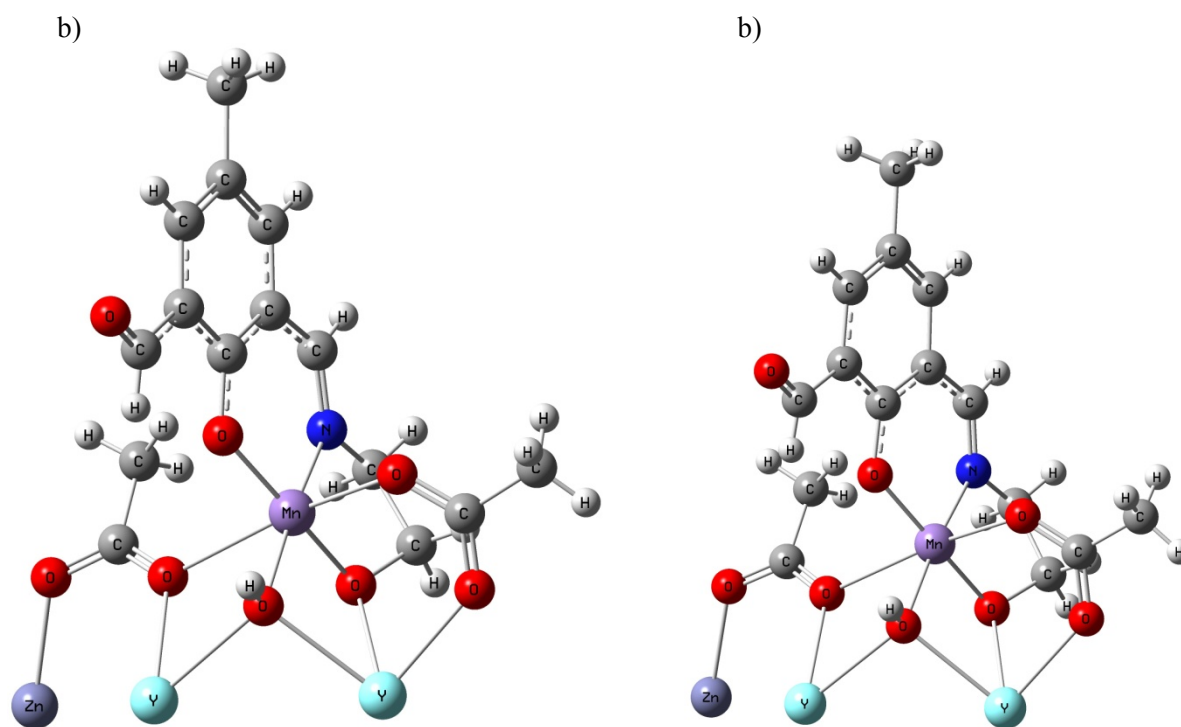

**Figure S12.** Structure of the calculated marginal Mn13 (left) and marginal Mn14 (right) fragments.

**Table S10.** Energies of the lowest spin free states of the marginal Mn<sup>3+</sup> sites.(cm<sup>-1</sup>)

| Spin Multiplicity | Mn13      | Mn14      |
|-------------------|-----------|-----------|
| 5                 | 0.000     | 0.000     |
|                   | 16488.700 | 16744.329 |
|                   | 20104.468 | 20007.587 |
|                   | 22224.911 | 22306.065 |
|                   | 24097.761 | 24287.101 |
| 3                 | 17951.095 | 18002.779 |
|                   | 19194.924 | 19349.115 |
|                   | 20579.624 | 20731.248 |
|                   | 22735.750 | 22722.411 |
|                   | 24352.976 | 24480.560 |
|                   | 25423.675 | 25471.647 |
|                   | 26032.857 | 26165.222 |
|                   | 26599.757 | 26623.677 |
|                   | 29162.015 | 29133.988 |
|                   | 33219.820 | 33145.120 |
|                   | 33835.349 | 33762.301 |
|                   | 34055.830 | 34045.881 |
|                   | 36658.292 | 36621.058 |
|                   | 37487.262 | 37484.527 |
|                   | 38906.076 | 39081.590 |
|                   | 39774.230 | 39744.227 |
|                   | 41543.428 | 41559.923 |
| 41816.384         | 41840.271 |           |
| 42390.190         | 42309.959 |           |
| 43429.815         | 43500.557 |           |
|                   | ...       | ...       |
| 1                 | 28800.992 | 28799.651 |
|                   | 29577.626 | 29630.178 |
|                   | 30353.074 | 30474.608 |
|                   | 31904.044 | 31999.041 |
|                   | 31975.958 | 32097.318 |

|  |           |           |
|--|-----------|-----------|
|  | 33985.989 | 34129.887 |
|  | 35737.917 | 35864.219 |
|  | 36512.921 | 36518.103 |
|  | 38204.400 | 38302.153 |
|  | 39442.109 | 39414.534 |
|  | 41032.938 | 41111.816 |
|  | 43767.826 | 43797.381 |
|  | 44331.152 | 44180.403 |
|  | 45228.244 | 45141.966 |
|  | 47860.498 | 47894.336 |
|  | 49300.752 | 49301.794 |
|  | 49560.350 | 49545.183 |
|  | 50047.090 | 50115.432 |
|  | 53517.532 | 53396.350 |
|  | 54299.041 | 54260.802 |
|  | ...       | ...       |

**Table S11.** Energies of the lowest spin-orbit states of the marginal Mn<sup>3+</sup> sites.(cm<sup>-1</sup>)

|              | <b>Mn13</b> | <b>Mn14</b> |
|--------------|-------------|-------------|
| zero field   | 0.000       | 0.000       |
| splitting of | 0.200       | 0.190       |
| the ground   | 7.670       | 7.717       |
| S=2 state    | 10.182      | 10.162      |
|              | 12.016      | 12.028      |
|              | 16424.473   | 16677.150   |
|              | 16433.780   | 16685.725   |
|              | 16442.303   | 16696.524   |
|              | 16475.423   | 16728.655   |
|              | 16476.016   | 16729.553   |
|              | 17956.595   | 18011.677   |
|              | 17963.669   | 18017.608   |
|              | 17970.590   | 18025.672   |
|              | 19221.416   | 19373.676   |
|              | 19225.798   | 19378.896   |
|              | 19231.447   | 19384.283   |
|              | 20085.734   | 19992.054   |
|              | 20086.681   | 19993.002   |
|              | 20100.149   | 20006.210   |
|              | 20108.707   | 20014.739   |
|              | 20111.461   | 20017.389   |
|              | 20593.824   | 20744.844   |
|              | 20597.568   | 20748.494   |
|              | 20604.542   | 20755.963   |
|              | 22204.878   | 22285.726   |
|              | 22205.225   | 22286.295   |
|              | 22218.716   | 22296.733   |
|              | 22224.574   | 22303.665   |
|              | 22227.678   | 22305.715   |
|              | 22738.322   | 22726.819   |
|              | 22743.975   | 22733.130   |
|              | 22757.150   | 22746.096   |
|              | 24054.080   | 24236.621   |
|              | 24062.230   | 24247.262   |
|              | 24086.723   | 24273.352   |
|              | 24112.761   | 24297.720   |
|              | 24117.443   | 24303.958   |
|              | 24332.107   | 24461.178   |
|              | 24372.002   | 24498.432   |
|              | 24388.044   | 24518.846   |
|              | ...         | ...         |



**Table S12.** Main values of the  $g$  tensor of the lowest  $\tilde{S} = 2$  on  $\text{Mn}^{3+}$  sites in complex 2-Y.

|    | <b>Mn13</b> | <b>Mn14</b> |
|----|-------------|-------------|
| gx | 1.9722      | 1.9740      |
| gy | 1.9926      | 1.9925      |
| gz | 1.9973      | 1.9978      |
